# Supplementary material for: Integrated Analysis of Microarray and RNA-Seq Data for the Identification of Hub Genes and Networks Involved in the Pancreatic Cancer
Source: Front Genet. 2021 Jun 23;12:663787. doi: 10.3389/fgene.2021.663787 (PMC8273913; doi:10.3389/fgene.2021.663787)
Supplement: Supplementary file 4 [file Data_Sheet_4.xlsx]

## Sheet: E-GEOD-15471
Term	Overlap	P-value	Adjusted P-value	Old P-value	Old Adjusted P-value	Odds Ratio	Combined Score	Genes
ECM-receptor interaction	23/82	7.56e-13	2.33e-10	0	0	6.26788	174.943	ITGB1;ITGB5;SDC4;LAMA2;LAMB3;ITGA3;ITGA2;FN1;LAMC2;LAMB1;LAMC1;THBS2;HSPG2;THBS3;COMP;COL1A1;COL1A2;COL4A2;COL4A1;COL6A2;COL6A3;SDC1;ITGAV
Focal adhesion	33/199	6.98e-11	1.07e-08	0	0	3.70568	86.6593	ITGB1;GSK3B;ITGB5;LAMA2;LAMC2;LAMC1;THBS2;MYL12B;THBS3;COMP;PDGFC;CAPN2;FLNA;ITGAV;RAC1;PDGFRB;PDGFRA;LAMB3;ITGA3;ACTN1;HGF;ITGA2;FN1;LAMB1;PTK2;COL1A1;COL1A2;COL4A2;COL4A1;COL6A2;COL6A3;MET;VCL
Proteoglycans in cancer	30/201	6.66e-09	6.84e-07	0	0	3.33528	62.7914	ITGB1;SDC4;ITGB5;TWIST1;ITPR3;IQGAP1;HIF1A;RRAS;PLAU;FLNA;DROSHA;ITGAV;RAC1;WNT2;FZD1;TGFB2;FZD2;LUM;HGF;MMP2;ITGA2;FZD6;WNT5A;FN1;PLAUR;HSPG2;PTK2;MRAS;SDC1;MET
Human papillomavirus infection	39/330	3.31e-08	2.55e-06	0	0	2.64093	45.4859	NOTCH2;ITGB1;NOTCH3;GSK3B;ITGB5;LAMA2;TRADD;LAMC2;LAMC1;THBS2;THBS3;COMP;DVL3;ITGAV;ATP6V1E1;WNT2;FZD1;PDGFRB;PRKCI;FZD2;LAMB3;ITGA3;ITGA2;FZD6;WNT5A;MX1;FN1;ISG15;LAMB1;PTK2;COL1A1;COL1A2;CDK6;PKM;COL4A2;COL4A1;COL6A2;COL6A3;ATP6V0C
Pathways in cancer	52/530	9.88e-08	6.08e-06	0	0	2.19247	35.3656	ITGB1;GSK3B;CXCL8;LAMC2;LAMC1;GLI3;GLI2;EDNRA;ITGAV;RAC1;IL13RA1;PDGFRB;IL15RA;PDGFRA;RALBP1;ITGA3;MMP1;IFNGR2;ITGA2;HGF;MMP2;F2R;WNT5A;MITF;BCR;COL4A2;COL4A1;MET;NOTCH2;NOTCH3;LAMA2;GSTP1;HIF1A;GNAI1;CTNNA1;DVL3;WNT2;RUNX1T1;FZD1;CDKN2B;TGFB2;FZD2;JUP;LAMB3;FZD6;FN1;LAMB1;AGT;PTK2;KITLG;CDK6;GNB5
Amoebiasis	18/96	2.21e-07	1.14e-05	0	0	4.18994	64.2042	TGFB2;CXCL8;LAMA2;LAMB3;IL1R1;ACTN1;FN1;HSPB1;LAMC2;LAMB1;LAMC1;PTK2;COL1A1;COL3A1;COL1A2;COL4A2;COL4A1;VCL
Complement and coagulation cascades	16/79	3.45e-07	1.52e-05	0	0	4.52585	67.3415	SERPINA1;CFH;C1S;C1R;F2R;CFI;PLAUR;PLAT;F3;F5;C3;PLAU;SERPING1;CD59;CD55;F2RL2
PI3K-Akt signaling pathway	37/354	1.59e-06	6.1e-05	0	0	2.33564	31.1918	ITGB1;GSK3B;ITGB5;LAMA2;IRS1;LAMC2;LAMC1;EFNA5;THBS2;THBS3;COMP;PDGFC;ITGAV;RAC1;YWHAH;PDGFRB;PDGFRA;LAMB3;ITGA3;HGF;ITGA2;F2R;FN1;LAMB1;OSMR;PTK2;COL1A1;KITLG;COL1A2;CDK6;COL4A2;COL4A1;COL6A2;COL6A3;GNB5;EIF4E2;MET
Small cell lung cancer	15/93	1.53e-05	0.000525	0	0	3.60425	39.9544	ITGB1;CDKN2B;LAMA2;LAMB3;ITGA3;ITGA2;FN1;LAMC2;LAMB1;LAMC1;PTK2;CDK6;COL4A2;COL4A1;ITGAV
Axon guidance	22/181	2.06e-05	0.000635	0	0	2.71613	29.3044	ITGB1;EPHA4;GSK3B;NRP1;BMPR2;SEMA3C;UNC5B;TRPC1;WNT5A;EFNA5;PTK2;GNAI1;MYL12B;EFNB2;PPP3CA;RRAS;RASA1;PLXNA1;PLXNB2;RAC1;MET;EPHA3
Hippo signaling pathway	20/160	3.22e-05	0.000902	0	0	2.7933	28.8899	FZD1;YAP1;WWTR1;GSK3B;PRKCI;TGFB2;FZD2;BMPR2;WNT5A;FZD6;STK3;GLI2;FRMD6;LATS2;CTNNA1;DVL3;SNAI2;WNT2;TEAD1;YWHAH
Protein digestion and absorption	14/90	4.44e-05	0.00113905	0	0	3.4761	34.8401	COL18A1;COL15A1;COL11A1;COL12A1;COL1A1;COL3A1;COL1A2;COL4A2;COL5A1;COL4A1;COL6A2;COL5A2;COL10A1;COL6A3
Phagosome	19/152	5.04e-05	0.00119316	0	0	2.7933	27.6433	DYNC2H1;ITGB1;DYNC1H1;ITGB5;C1R;TUBB;ITGA2;THBS2;THBS3;COMP;C3;MRC2;TUBA1A;OLR1;ITGAV;RAC1;ATP6V1E1;PLA2R1;ATP6V0C
Regulation of actin cytoskeleton	23/214	9.48e-05	0.00208502	0	0	2.40171	22.2495	PDGFRB;ITGB1;PDGFRA;ITGB5;ITGA3;ACTN1;ITGA2;F2R;FN1;IQGAP1;PTK2;MYL12B;DIAPH2;MRAS;RRAS;ABI2;TMSB4X;PDGFC;MYH9;ITGAV;RAC1;WASF1;VCL
AGE-RAGE signaling pathway in diabetic complications	13/100	0.000512	0.0105196	0	0	2.90503	22.0101	TGFB2;CXCL8;MMP2;FN1;F3;AGT;COL1A1;COL3A1;COL1A2;COL4A2;COL4A1;NOX4;RAC1
Arrhythmogenic right ventricular cardiomyopathy (ARVC)	1972-10-01	0.00132516	0.0255093	0	0	3.10366	20.5656	ITGB1;CACNB3;ITGB5;LAMA2;JUP;SGCB;ITGA3;ITGA2;CTNNA1;ITGAV
Malaria	1949-08-01	0.00137583	0.0249268	0	0	3.64839	24.0381	COMP;TGFB2;CXCL8;HGF;SDC1;THBS2;MET;THBS3
Hypertrophic cardiomyopathy (HCM)	1985-11-01	0.00140239	0.0239965	0	0	2.89188	18.9984	ITGB1;CACNB3;TGFB2;ITGB5;TPM4;LAMA2;SGCB;ITGA3;ITGA2;ITGAV;AGT
Basal cell carcinoma	1963-09-01	0.00186595	0.0302481	0	0	3.19234	20.0606	FZD1;GSK3B;FZD2;WNT5A;FZD6;DVL3;WNT2;GLI3;GLI2
Wnt signaling pathway	16/158	0.00196204	0.0302154	0	0	2.26292	14.1065	FZD1;GSK3B;FZD2;WNT5A;FZD6;PRICKLE2;PRICKLE1;DKK1;VANGL1;SFRP4;PPP3CA;SFRP2;RUVBL1;DVL3;RAC1;WNT2
Dilated cardiomyopathy (DCM)	1991-11-01	0.00244215	0.0358182	0	0	2.70121	16.2474	ITGB1;CACNB3;TGFB2;ITGB5;TPM4;LAMA2;SGCB;ITGA3;ITGA2;ITGAV;AGT
Leukocyte transendothelial migration	12/112	0.00436046	0.0610465	0	0	2.39425	13.0132	ITGB1;CLDN11;ACTN1;MMP2;CTNNA1;THY1;RAC1;VCL;PTK2;GNAI1;MYL12B;JAM3
Adherens junction	1972-09-01	0.00469882	0.0629233	0	0	2.7933	14.9733	FER;ACTN1;CTNNA1;SNAI2;RAC1;IQGAP1;WASF1;MET;VCL
Salmonella infection	1986-10-01	0.00500087	0.0641779	0	0	2.59841	13.7668	DYNC2H1;DYNC1H1;CXCL8;IFNGR2;MYH9;FLNA;RAC1;TLR5;KLC1;WASF1
Bacterial invasion of epithelial cells	1974-09-01	0.00563864	0.069468	0	0	2.7178	14.0731	ITGB1;DNM3;CTNNA1;FN1;RAC1;WASF1;MET;VCL;PTK2
Central carbon metabolism in cancer	1965-08-01	0.00823478	0.0975505	0	0	2.75032	13.1999	PDGFRB;PDGFRA;PKM;MET;HIF1A;PFKM;HK2;PFKP
Lysosome	12/123	0.00911455	0.103973	0	0	2.18013	10.242	CTSA;AP3M2;GM2A;NPC1;CTSK;HEXA;CTSH;NAGA;CTSE;CTSD;ATP6V0C;IGF2R
Rap1 signaling pathway	17/206	0.0113821	0.125203	0	0	1.84412	8.25374	PDGFRB;ITGB1;PDGFRA;PRKCI;DOCK4;HGF;F2R;SIPA1L2;EFNA5;GNAI1;KITLG;MRAS;RRAS;PDGFC;PRKD1;RAC1;MET
Galactose metabolism	1931-05-01	0.0114518	0.121626	0	0	3.60425	16.1096	AKR1B1;PGM2;PFKM;HK2;PFKP
MAPK signaling pathway	22/295	0.0136586	0.140228	0	0	1.66651	7.15496	PDGFRB;PDGFRA;TGFB2;IL1R1;HGF;TRADD;HSPB1;IL1RAP;EFNA5;STK3;PPP3CA;KITLG;CACNB3;MRAS;RRAS;TAOK1;RASA1;PDGFC;FLNA;RAC1;MET;MAP4K4
Melanogenesis	10/101	0.0149687	0.148721	0	0	2.21251	9.29652	FZD1;GSK3B;KITLG;FZD2;WNT5A;FZD6;DVL3;MITF;WNT2;GNAI1
Gastric cancer	13/149	0.016447	0.158302	0	0	1.94968	8.00855	FZD1;GSK3B;TGFB2;CDKN2B;FZD2;JUP;HGF;WNT5A;FZD6;CTNNA1;DVL3;WNT2;MET
Glycerolipid metabolism	1961-07-01	0.0187555	0.175051	0	0	2.56434	10.1965	PLPP4;LIPG;MBOAT1;AKR1B1;MBOAT2;MGLL;AGPAT4
TGF-beta signaling pathway	1990-09-01	0.0192331	0.174229	0	0	2.23464	8.82933	ACVR1;TGIF1;TGFB2;CDKN2B;BMPR2;SMURF1;INHBA;NBL1;LTBP1
Pertussis	1976-08-01	0.0200907	0.176798	0	0	2.35225	9.19141	ITGB1;C3;CXCL8;C1S;C1R;SERPING1;CXCL5;GNAI1
Cushing syndrome	13/155	0.022058	0.188719	0	0	1.87421	7.14839	FZD1;GSK3B;CDKN2B;FZD2;WNT5A;FZD6;ITPR3;GNAI1;AGT;NCEH1;CDK6;DVL3;WNT2
Signaling pathways regulating pluripotency of stem cells	12/139	0.0222443	0.185168	0	0	1.92918	7.34184	ACVR1;FZD1;GSK3B;ZFHX3;FZD2;BMPR2;WNT5A;FZD6;DVL3;INHBA;SKIL;WNT2
Platelet activation	11/124	0.0233435	0.189205	0	0	1.98234	7.44851	COL1A1;ITGB1;PRKCI;COL3A1;COL1A2;ITGA2;F2R;ITPR3;PRKG1;GNAI1;MYL12B
Apoptosis	12/143	0.0270352	0.213509	0	0	1.87522	6.7707	TUBA1A;TRADD;CTSK;CAPN2;TNFRSF10B;CTSH;ITPR3;TNFRSF10A;CAPN1;PTPN13;CTSD;SPTAN1
Cell adhesion molecules (CAMs)	12/145	0.0296938	0.228642	0	0	1.84935	6.50384	ITGB1;CLDN11;VCAN;CDH3;SDC4;SDC1;ITGAV;CD58;GLG1;MPZL1;CD276;JAM3
Toxoplasmosis	10/113	0.0301715	0.226654	0	0	1.97755	6.92314	ITGB1;TGFB2;LAMA2;LAMB3;IFNGR2;ALOX5;LAMC2;LAMB1;LAMC1;GNAI1
Epithelial cell signaling in Helicobacter pylori infection	1968-07-01	0.0319595	0.234369	0	0	2.30036	7.9208	CXCL8;ADAM10;RAC1;ATP6V1E1;ATP6V0C;MET;JAM3
Glycolysis / Gluconeogenesis	1968-07-01	0.0319595	0.228919	0	0	2.30036	7.9208	PKM;PGM2;BPGM;ENO2;PFKM;HK2;PFKP
Phospholipase D signaling pathway	12/148	0.0340278	0.238195	0	0	1.81187	6.12516	PDGFRB;DNM3;CYTH3;PDGFRA;KITLG;CXCL8;MRAS;RRAS;F2R;PDGFC;AGT;AGPAT4
Hepatocellular carcinoma	13/168	0.0389234	0.266409	0	0	1.72918	5.61321	FZD1;GSK3B;TGFB2;FZD2;HGF;GSTP1;WNT5A;FZD6;SMARCA4;CDK6;DVL3;WNT2;MET
Transcriptional misregulation in cancer	14/186	0.040226	0.269339	0	0	1.68198	5.40462	CEBPB;CXCL8;JUP;PLAT;MITF;ETV1;MLLT3;RUNX2;PTK2;ETV6;ZEB1;PLAU;MET;RUNX1T1
Melanoma	1972-07-01	0.0417625	0.273678	0	0	2.17256	6.89953	PDGFRB;PDGFRA;CDK6;HGF;PDGFC;MITF;MET
Cytokine-cytokine receptor interaction	20/294	0.0420291	0.269687	0	0	1.52016	4.81799	ACVR1;IL15RA;IL1RN;TGFB2;CXCL8;BMPR2;IL1R1;IFNGR2;TNFRSF10B;TNFRSF11B;TNFRSF10A;IL1RAP;INHBA;OSMR;CX3CL1;CXCL5;CXCL16;TNFSF4;TNFRSF21;IL13RA1
Gap junction	1988-08-01	0.0432138	0.27163	0	0	2.03149	6.38211	PDGFRB;PDGFRA;TUBA1A;TUBB;PDGFC;ITPR3;PRKG1;GNAI1
Pentose phosphate pathway	1930-04-01	0.0433205	0.266855	0	0	2.97952	9.35308	RPE;PGM2;PFKM;PFKP
Fluid shear stress and atherosclerosis	11/139	0.0477211	0.288198	0	0	1.76842	5.3802	ACVR1;BMPR2;SDC4;IL1R1;MMP2;GSTP1;SDC1;PLAT;ITGAV;RAC1;PTK2

## Sheet: E-GEOD-18670
Term	Overlap	P-value	Adjusted P-value	Old P-value	Old Adjusted P-value	Odds Ratio	Combined Score	Genes
Cell cycle	34/124	2.28e-11	7.01e-09	0	0	3.62211	88.7635	GSK3B;MCM7;HDAC1;BUB1B;TTK;CDC20;CCNB2;CCNB1;ORC6;CDC45;PTTG1;CHEK1;ORC2;SFN;BUB1;SMAD3;CDC6;CDC25C;YWHAZ;CDC25A;CDC25B;CCNA2;CDK6;TFDP1;ESPL1;CCNE1;CDK2;CDK1;MCM3;MCM4;MCM5;MAD1L1;MCM2;MAD2L1
Human papillomavirus infection	59/330	4.68e-10	7.2e-08	0	0	2.36179	50.7382	GSK3B;PATJ;ITGB5;ITGB4;TRADD;PPP2R2A;LAMC2;PIK3CB;OASL;LFNG;CASP8;ITGB8;PRKCI;MAP2K1;ITGA3;ITGA2;WNT5A;HLA-B;HLA-C;SCRIB;HLA-F;TUBG1;TICAM1;HLA-G;CCNA2;PKM;IRF3;CCNE1;IRF1;ITGA6;IRF9;LLGL2;LAMA5;HDAC1;LAMA3;PRKCZ;RELA;EGFR;PARD6B;DVL1;ATP6V1H;FADD;BAK1;BCAP31;TCF7L2;WNT10A;JAG1;FZD5;LAMB3;STAT1;MX1;ISG15;PTK2;VEGFA;DLG1;CDK6;PPP2R2C;CDK2;KRAS
Viral carcinogenesis	41/201	4.29e-09	4.4e-07	0	0	2.69459	51.9171	VAC14;SRC;HDAC1;TRADD;HIST1H2BK;PIK3CB;RELA;CDC20;POLB;CASP8;CHEK1;PMAIP1;RAC1;BAK1;ACTN1;HLA-B;HLA-C;SCRIB;ACTN4;HLA-F;HLA-G;YWHAZ;HIST2H2BE;CCNA2;DLG1;CDK6;PKM;IRF3;CCNE1;DNAJA3;CDK2;CDK1;IRF7;HIST1H4H;HIST1H2BE;HIST1H2BH;KRAS;MAD1L1;HIST1H2BD;IRF9;HIST1H2BC
p53 signaling pathway	21/72	4.56e-08	3.51e-06	0	0	3.85293	65.1235	STEAP3;RRM2;CD82;IGFBP3;SHISA5;TNFRSF10B;SERPINB5;PIDD1;CCNB2;CCNB1;CASP8;CDK6;CCNE1;PERP;CHEK1;CDK2;CDK1;PMAIP1;SFN;GTSE1;BCL2L1
Human immunodeficiency virus 1 infection	38/212	5.31e-07	3.27e-05	0	0	2.36784	34.2136	TRADD;ITPR3;PIK3CB;RELA;CCNB2;PAK1;CCNB1;CASP8;IRAK1;AP1G2;AP1G1;CHEK1;AP1S1;AP1S3;FADD;RAC1;BAK1;PAK2;PDIA3;MAP2K1;HLA-B;TAP2;HLA-C;TAP1;HLA-F;TMEM173;CDC25C;MAPK14;HLA-G;PTK2;TAPBP;BST2;IRF3;GNB1;CDK1;KRAS;MYD88;BCL2L1
Axon guidance	34/181	6.8e-07	3.49e-05	0	0	2.48144	35.2378	GSK3B;SRC;PIK3CB;SEMA3F;EFNA5;EFNA4;PRKCZ;MYL12A;EFNB2;PARD6B;PAK1;RRAS;PLXNA2;PLXNA1;RAC1;EPHB2;PAK2;EPHB4;PLXNA3;EPHA4;UNC5B;SEMA4B;WNT5A;SEMA4G;SSH3;PTK2;EFNA1;EFNA2;PLXNB2;KRAS;EPHA1;MET;NGEF;EPHA2
Hepatitis C	30/155	1.59e-06	6.98e-05	0	0	2.55678	34.1424	GSK3B;TRADD;PPP2R2A;PIK3CB;CLDN2;RELA;EGFR;CASP8;CLDN23;FADD;BAK1;MAP2K1;RSAD2;STAT1;EIF2AK1;MX1;CFLAR;TICAM1;YWHAZ;CLDN4;CDK6;OAS1;IRF3;PPP2R2C;OAS2;OAS3;CDK2;IRF7;KRAS;IRF9
Epstein-Barr virus infection	35/201	2.92e-06	0.000112	0	0	2.30026	29.3139	HDAC1;TRADD;PIK3CB;RELA;RELB;CASP8;IRAK1;PSMD2;PSMD3;FADD;RAC1;BAK1;PDIA3;STAT1;HLA-B;TAP2;HLA-C;TAP1;ISG15;HLA-F;MAPK14;HLA-G;TAPBP;CCNA2;CDK6;OAS1;IRF3;PSMC4;CCNE1;OAS2;OAS3;CDK2;IRF7;MYD88;IRF9
Tight junction	31/170	3.97e-06	0.000136	0	0	2.40889	29.959	PATJ;SRC;PPP2R2A;WASL;CLDN2;F11R;PRKCZ;MYL12A;PARD6B;CLDN23;ERBB2;MICALL2;MYH14;RAC1;VASP;PRKCI;ACTN1;ARHGEF18;SCRIB;ACTN4;CGN;PRKAB1;TUBA4A;CLDN4;DLG1;CTTN;PPP2R2C;ARHGEF2;EZR;TJP3;LLGL2
Adherens junction	18/72	4.83e-06	0.000149	0	0	3.30251	40.423	FARP2;TCF7L2;SMAD3;CSNK2A1;SRC;ACTN1;LMO7;WASL;ACTN4;BAIAP2;PTPRF;EGFR;ERBB2;CTNNA1;RAC1;NECTIN4;MET;NECTIN2
Hippo signaling pathway	29/160	9.08e-06	0.000254	0	0	2.39432	27.7975	YAP1;GSK3B;PATJ;PPP2R2A;PRKCZ;NKD1;PARD6B;PAK1;DVL1;CTNNA1;TEAD3;TCF7L2;PRKCI;WNT10A;SMAD3;FZD5;WNT5A;SCRIB;CSNK1E;YWHAZ;BMP4;DLG1;BMP2;LATS2;PPP2R2C;ID1;BIRC5;AJUBA;LLGL2
Endocytosis	38/244	1.68e-05	0.00043	0	0	2.0573	22.6217	ARF3;SH3KBP1;SRC;WIPF2;CLTB;CBLC;AGAP1;WASL;ASAP2;PRKCZ;RAB22A;EGFR;CYTH2;PARD6B;PSD4;CHMP1A;RAB11FIP4;RAB11FIP5;PRKCI;SMAD3;SMURF1;HLA-B;HLA-C;EPS15L1;AP2B1;VPS37B;HLA-F;HLA-G;IGF2R;ARFGAP1;PML;DNM2;EHD1;RAB10;ITCH;HGS;STAMBP;ARF6
Fructose and mannose metabolism	1933-11-01	1.83e-05	0.000435	0	0	4.40335	48.0227	TSTA3;PFKL;TPI1;GMDS;HKDC1;GMPPA;ALDOC;ALDOA;HK2;PFKP;HK1
Glycolysis / Gluconeogenesis	16/68	3.63e-05	0.000798	0	0	3.10824	31.7796	GPI;TPI1;ENO1;ENO2;HK2;HK1;ALDH3A1;PFKL;PKM;HKDC1;ALDH3B1;PGK1;ALDOC;ALDOA;GAPDH;PFKP
Measles	25/138	3.7e-05	0.00076	0	0	2.39312	24.4192	GSK3B;TRADD;ADAR;PIK3CB;RELA;IFIH1;CASP8;IRAK1;FADD;BAK1;CSNK2A1;STAT1;EIF2AK1;MX1;CDK6;OAS1;IRF3;CCNE1;OAS2;OAS3;CDK2;IRF7;MYD88;IRF9;BCL2L1
Apoptosis	25/143	6.81e-05	0.00131073	0	0	2.30945	22.1584	TRADD;XIAP;ITPR3;PIK3CB;LMNB2;RELA;LMNB1;PIDD1;CASP8;PMAIP1;CAPN1;FADD;BAK1;MAP2K1;DFFA;PARP3;PARP4;TNFRSF10B;TNFRSF10A;CFLAR;TUBA4A;DDIT3;BIRC5;KRAS;BCL2L1
Base excision repair	1933-10-01	0.00011	0.00199875	0	0	4.00304	36.4762	POLB;FEN1;PARP3;NEIL3;PARP4;LIG1;NTHL1;POLD1;POLE2;UNG
Pancreatic cancer	16/75	0.000128	0.00218212	0	0	2.81814	25.2708	MAP2K1;RALA;SMAD3;STAT1;TGFA;PIK3CB;RELA;EGFR;VEGFA;CDK6;RAD51;ERBB2;KRAS;RAC1;BAK1;BCL2L1
Cellular senescence	26/160	0.000171	0.00277283	0	0	2.14663	18.6189	ITPR3;PIK3CB;FOXM1;RELA;CCNB2;CCNB1;RRAS;CHEK1;CAPN1;MAP2K1;SMAD3;IGFBP3;HLA-B;HLA-C;HLA-F;MAPK14;HLA-G;CDC25A;CCNA2;CDK6;CCNE1;CDK2;CDK1;KRAS;MCU;RAD9A
Small cell lung cancer	18/93	0.000185	0.00285564	0	0	2.55678	21.97	LAMA5;LAMB3;ITGA3;ITGA2;LAMA3;XIAP;LAMC2;PIK3CB;RELA;PTK2;CKS1B;CDK6;TRAF4;CCNE1;CDK2;ITGA6;BAK1;BCL2L1
Focal adhesion	30/199	0.000224	0.0032864	0	0	1.99146	16.7353	GSK3B;LAMA5;ITGB5;SHC1;ITGB4;SRC;LAMA3;XIAP;LAMC2;PIK3CB;MYL12A;EGFR;PAK1;ERBB2;ITGB8;FLNB;RAC1;PAK2;VASP;MAP2K1;LAMB3;ITGA3;ACTN1;ITGA2;ACTN4;PTK2;VEGFA;DIAPH1;ITGA6;MET
DNA replication	1936-10-01	0.000246	0.00344101	0	0	3.66946	30.497	FEN1;RNASEH1;MCM7;LIG1;POLD1;POLE2;MCM3;MCM4;MCM5;MCM2
Human T-cell leukemia virus 1 infection	32/219	0.000252	0.00337784	0	0	1.93023	15.9922	VAC14;SLC2A1;XIAP;BUB1B;PIK3CB;RELA;RELB;CDC20;POLB;CCNB2;XPO1;PTTG1;CHEK1;TSPO;IL15RA;MAP2K1;SMAD3;IL1R2;HLA-B;HLA-C;HLA-F;HLA-G;CCNA2;DLG1;ESPL1;CCNE1;CDK2;KRAS;TCF3;MAD1L1;MAD2L1;BCL2L1
Central carbon metabolism in cancer	14/65	0.000298	0.00382369	0	0	2.84524	23.0993	MAP2K1;SLC2A1;PIK3CB;SLC1A5;HK2;EGFR;HK1;PFKL;PKM;HKDC1;ERBB2;KRAS;MET;PFKP
HIF-1 signaling pathway	18/100	0.000471	0.00580524	0	0	2.37781	18.2145	EGLN1;MAP2K1;EGLN3;SLC2A1;ENO1;PIK3CB;ENO2;HK2;RELA;EGFR;HK1;VEGFA;PFKL;HKDC1;ERBB2;PGK1;ALDOA;GAPDH
Influenza A	26/171	0.000498	0.00590401	0	0	2.00854	15.2732	GSK3B;TMPRSS4;ADAR;PIK3CB;RELA;IFIH1;XPO1;RAE1;AGFG1;MAP2K1;RSAD2;STAT1;EIF2AK1;MX1;TNFRSF10B;TNFRSF10A;TICAM1;MAPK14;PML;OAS1;IRF3;OAS2;OAS3;IRF7;MYD88;IRF9
Regulation of actin cytoskeleton	29/214	0.00161157	0.0183838	0	0	1.79015	11.5116	ITGB5;ITGB4;SRC;WASL;PIK3CB;IQGAP3;MYL12A;EGFR;SLC9A1;PAK1;RRAS;MYH14;ITGB8;PIP4K2C;RAC1;PAK2;MAP2K1;ITGA3;ACTN1;ITGA2;ACTN4;BAIAP2;SSH3;PTK2;DIAPH1;DIAPH3;ITGA6;KRAS;EZR
Kaposi sarcoma-associated herpesvirus infection	26/186	0.00175884	0.0193472	0	0	1.84656	11.7129	GSK3B;SRC;TRADD;ITPR3;PIK3CB;RELA;CASP8;FADD;RAC1;BAK1;MICB;MAP2K1;STAT1;HLA-B;HLA-C;TICAM1;HLA-F;MAPK14;HLA-G;VEGFA;CDK6;IRF3;GNB1;IRF7;KRAS;IRF9
Renal cell carcinoma	13/69	0.00180779	0.0192	0	0	2.48885	15.7187	EGLN1;MAP2K1;EGLN3;PRCC;SLC2A1;TGFA;PIK3CB;VEGFA;PAK1;KRAS;RAC1;MET;PAK2
Necroptosis	23/162	0.0025669	0.0263535	0	0	1.8755	11.1875	PYGB;PARP3;PARP4;H2AFY;STAT1;TRADD;H2AFX;SPATA2;TNFRSF10B;XIAP;TNFRSF10A;CFLAR;TICAM1;SHARPIN;CASP8;HIST3H2A;CHMP1A;STAT6;CAPN1;RBCK1;FADD;HIST1H2AC;IRF9
Proteoglycans in cancer	27/201	0.00259519	0.0257845	0	0	1.77448	10.5654	ITGB5;SRC;IHH;ITPR3;PIK3CB;EGFR;SLC9A1;PAK1;RRAS;ERBB3;ERBB2;FLNB;RAC1;WNT10A;MAP2K1;FZD5;ITGA2;WNT5A;PLAUR;MAPK14;PTK2;VEGFA;CTTN;SDC1;KRAS;EZR;MET
Arrhythmogenic right ventricular cardiomyopathy (ARVC)	13/72	0.00268559	0.0258488	0	0	2.38515	14.1197	TCF7L2;ITGB5;JUP;ITGB4;ITGA3;ITGA2;ATP2A2;CACNB3;PKP2;CTNNA1;ITGB8;ITGA6;DSC2
Progesterone-mediated oocyte maturation	16/99	0.00303046	0.0282843	0	0	2.13496	12.3807	MAP2K1;PIK3CB;CDC25C;MAPK14;CDC25A;CDC25B;AURKA;CCNA2;CCNB2;CCNB1;CDK2;CDK1;KRAS;BUB1;MAD1L1;MAD2L1
Pyrimidine metabolism	1957-11-01	0.00326016	0.0295332	0	0	2.54931	14.5973	CDA;DTYMK;NT5E;CANT1;RRM2;ENTPD6;CMPK2;TK1;TYMS;TYMP;UCKL1
Neomycin, kanamycin and gentamicin biosynthesis	2020-05-03	0.00385403	0.0339154	0	0	7.92602	44.0579	HKDC1;HK2;HK1
ErbB signaling pathway	14/85	0.00450278	0.0385238	0	0	2.17577	11.7558	GSK3B;MAP2K1;SHC1;SRC;TGFA;PIK3CB;EGFR;PTK2;EREG;PAK1;ERBB3;ERBB2;KRAS;PAK2
Colorectal cancer	14/86	0.00501278	0.041728	0	0	2.15047	11.3884	GSK3B;TCF7L2;MAP2K1;RALA;SMAD3;TGFA;PIK3CB;EGFR;EREG;BIRC5;PMAIP1;KRAS;RAC1;BAK1
Hepatitis B	22/163	0.00580713	0.0470683	0	0	1.78295	9.17982	MAP2K1;SMAD3;SRC;STAT1;PIK3CB;TICAM1;MAPK14;YWHAZ;RELA;IFIH1;CCNA2;CASP8;IRAK1;IRF3;CCNE1;CDK2;IRF7;BIRC5;STAT6;KRAS;FADD;MYD88
Pentose phosphate pathway	1930-07-01	0.00608734	0.0480744	0	0	3.08234	15.7247	GPI;PFKL;RPE;TALDO1;ALDOC;ALDOA;PFKP
Prostate cancer	15/97	0.0061291	0.047194	0	0	2.04279	10.4074	GSK3B;TCF7L2;MAP2K1;IL1R2;MMP3;TGFA;PLAT;PIK3CB;ETV5;RELA;EGFR;CCNE1;CDK2;ERBB2;KRAS
Human cytomegalovirus infection	28/225	0.00644059	0.0483829	0	0	1.64392	8.29378	GSK3B;SRC;TRADD;ITPR3;PIK3CB;RELA;EGFR;CASP8;FADD;RAC1;BAK1;PDIA3;MAP2K1;HLA-B;TAP2;HLA-C;TAP1;HLA-F;TMEM173;MAPK14;HLA-G;PTK2;VEGFA;TAPBP;CDK6;IRF3;GNB1;KRAS
Pathways in cancer	56/530	0.00705839	0.0517616	0	0	1.39578	6.91404	GSK3B;HHIP;SLC2A1;LAMC2;PIK3CB;CKS1B;CASP8;RAC1;IL15RA;MAP2K1;ITGA3;ITGA2;WNT5A;BCR;TRAF4;CCNE1;BIRC5;ITGA6;MET;LAMA5;RALA;HDAC1;LAMA3;TGFA;XIAP;EGFR;RELA;DVL1;ERBB2;CTNNA1;PMAIP1;STAT6;BAK1;FADD;EGLN1;NQO1;TCF7L2;WNT10A;EGLN3;JAG1;SMAD3;FZD5;JUP;LAMB3;STAT1;PML;PTK2;VEGFA;BMP4;BMP2;CDK6;RAD51;CDK2;GNB1;KRAS;BCL2L1
Insulin signaling pathway	19/137	0.00744038	0.0532939	0	0	1.83205	8.97857	GSK3B;PYGB;PRKCI;MAP2K1;IRS1;SHC1;INPPL1;IRS2;PIK3CB;PRKAB1;PRKCZ;PTPRF;HK2;HK1;GYS1;HKDC1;TRIP10;FLOT2;KRAS
NOD-like receptor signaling pathway	23/178	0.00822799	0.0575959	0	0	1.70692	8.19356	STAT1;XIAP;ITPR3;TICAM1;TMEM173;MAPK14;RELA;SHARPIN;CASP8;OAS1;IRF3;ATG16L1;OAS2;OAS3;TRIP6;IRF7;RBCK1;FADD;MYD88;MCU;IRF9;BCL2L1;GBP3
ECM-receptor interaction	13/82	0.00838758	0.0574083	0	0	2.09427	10.0127	LAMA5;ITGB5;LAMB3;ITGB4;ITGA3;ITGA2;LAMA3;LAMC2;HMMR;ITGB8;SDC1;ITGA6;AGRN
Bacterial invasion of epithelial cells	1974-12-01	0.00928068	0.0621402	0	0	2.14217	10.025	CTTN;SHC1;SRC;CLTB;CTNNA1;ELMO3;PIK3CB;WASL;RAC1;MET;PTK2;DNM2
MAPK signaling pathway	34/295	0.009401	0.0616065	0	0	1.52251	7.10548	PTPRR;TRADD;TGFA;IL1RAP;EFNA5;EFNA4;RELA;EGFR;RELB;PAK1;RRAS;IRAK1;ERBB3;ERBB2;FLNB;RAC1;PAK2;MAP4K4;DUSP4;MAP2K1;MAPK14;EREG;DUSP7;VEGFA;CDC25B;EFNA1;CACNB3;EFNA2;DDIT3;KRAS;MET;MYD88;MAP3K11;EPHA2
PI3K-Akt signaling pathway	39/354	0.0117259	0.075241	0	0	1.45534	6.4704	GSK3B;LAMA5;ITGB5;IRS1;ITGB4;LAMA3;TGFA;PPP2R2A;LAMC2;PIK3CB;EFNA5;EFNA4;RELA;EGFR;GYS1;ERBB3;ERBB2;ITGB8;RAC1;MAP2K1;LAMB3;ITGA3;ITGA2;YWHAZ;PTK2;EREG;VEGFA;EFNA1;EFNA2;CDK6;PPP2R2C;CCNE1;GNB1;CDK2;ITGA6;KRAS;MET;EPHA2;BCL2L1
NF-kappa B signaling pathway	14/95	0.012007	0.0754727	0	0	1.94674	8.60901	UBE2I;CSNK2A1;TRADD;XIAP;BCL10;CFLAR;TICAM1;RELA;RELB;PIDD1;IRAK1;CARD11;MYD88;BCL2L1
Transcriptional misregulation in cancer	23/186	0.0135989	0.0837692	0	0	1.6335	7.0204	SLC45A3;KMT2A;JUP;HDAC1;IL1R2;IGFBP3;MMP3;PRCC;HMGA2;PLAT;KLF3;PTK2;ETV5;RELA;PML;HOXA10;DDIT3;NSD2;TCF3;BAK1;MET;MEN1;BCL2L1
RIG-I-like receptor signaling pathway	1970-11-01	0.015594	0.0941752	0	0	2.07586	8.6374	IFIH1;CASP8;IRF3;TRADD;DHX58;IRF7;ISG15;FADD;TMEM173;MAPK14;RELA
Gastric cancer	19/149	0.0174218	0.103191	0	0	1.6845	6.82229	GSK3B;TCF7L2;MAP2K1;WNT10A;SMAD3;FZD5;JUP;SHC1;WNT5A;PIK3CB;EGFR;CCNE1;DVL1;CDK2;ERBB2;CTNNA1;KRAS;BAK1;MET
Sphingolipid signaling pathway	16/119	0.0175266	0.101853	0	0	1.77614	7.18277	MAP2K1;ABCC1;CERS6;TRADD;PPP2R2A;PIK3CB;SGMS2;MAPK14;PRKCZ;SGPP2;RELA;SGPL1;SPTLC2;PPP2R2C;KRAS;RAC1
Glycosphingolipid biosynthesis	1945-08-01	0.0184355	0.10515	0	0	2.34845	9.37849	FUT6;B3GALT4;B3GNT3;FUT2;ST3GAL1;FUT4;B4GALT4;FUT3
TNF signaling pathway	15/110	0.0186733	0.10457	0	0	1.80137	7.17064	MAP2K1;JAG1;CCL20;TRADD;MMP3;PIK3CB;CFLAR;MAPK14;RELA;BAG4;MMP14;ITCH;CASP8;IRF1;FADD
Basal cell carcinoma	1963-10-01	0.0192812	0.106047	0	0	2.09683	8.2796	BMP4;GSK3B;TCF7L2;WNT10A;BMP2;FZD5;HHIP;WNT5A;DVL1;BAK1
Aldosterone-regulated sodium reabsorption	1937-07-01	0.0194079	0.104871	0	0	2.4992	9.85202	HSD11B2;IRS1;SCNN1A;SFN;KRAS;PIK3CB;ATP1B1
Type II diabetes mellitus	1946-08-01	0.0208813	0.110887	0	0	2.2974	8.8884	PKM;IRS1;HKDC1;IRS2;PIK3CB;PRKCZ;HK2;HK1
Chagas disease (American trypanosomiasis)	14/103	0.0231362	0.120779	0	0	1.79554	6.76265	SMAD3;ACE;PPP2R2A;PIK3CB;CFLAR;TICAM1;MAPK14;RELA;GNA15;CASP8;IRAK1;PPP2R2C;FADD;MYD88
C-type lectin receptor signaling pathway	14/104	0.0249397	0.128024	0	0	1.77827	6.56413	SRC;STAT1;ITPR3;BCL10;PIK3CB;MAPK14;RELA;RELB;PAK1;CASP8;RRAS;IRF1;KRAS;IRF9
Toll-like receptor signaling pathway	14/104	0.0249397	0.125925	0	0	1.77827	6.56413	MAP2K1;STAT1;CD80;PIK3CB;TICAM1;MAPK14;RELA;CASP8;IRAK1;IRF3;IRF7;FADD;RAC1;MYD88
Amino sugar and nucleotide sugar metabolism	1948-08-01	0.0264459	0.131376	0	0	2.20167	7.99792	GPI;TSTA3;GALE;GMDS;HKDC1;GMPPA;HK2;HK1
Oocyte meiosis	16/125	0.0266444	0.130261	0	0	1.69089	6.12976	MAP2K1;ITPR3;CDC25C;YWHAZ;AURKA;CDC20;CCNB2;CCNB1;PTTG1;ESPL1;CCNE1;CDK2;CDK1;BUB1;MAD1L1;MAD2L1
Galactose metabolism	1931-06-01	0.0266646	0.128323	0	0	2.55678	9.26685	GALE;PFKL;HKDC1;HK2;PFKP;HK1
Mucin type O-glycan biosynthesis	1931-06-01	0.0266646	0.126349	0	0	2.55678	9.26685	ST6GALNAC1;GALNT5;C1GALT1;GCNT3;ST3GAL1;GALNT10
Chronic myeloid leukemia	1976-11-01	0.0273833	0.127789	0	0	1.91198	6.87896	BCR;MAP2K1;SMAD3;CDK6;SHC1;HDAC1;KRAS;PIK3CB;BAK1;RELA;BCL2L1
Hepatocellular carcinoma	20/168	0.0292624	0.13452	0	0	1.57262	5.55365	GSK3B;NQO1;TCF7L2;MAP2K1;WNT10A;SMAD3;FZD5;SHC1;WNT5A;TGFA;PIK3CB;EGFR;SMARCA4;CDK6;DVL1;KRAS;BAK1;BRD7;MET;BCL2L1
Endometrial cancer	1958-09-01	0.0293421	0.132903	0	0	2.04983	7.23331	GSK3B;TCF7L2;MAP2K1;ERBB2;CTNNA1;KRAS;PIK3CB;BAK1;EGFR
Ubiquitin mediated proteolysis	17/137	0.0298159	0.133091	0	0	1.6392	5.75805	PIAS3;UBE2H;UBE2I;UBA6;UBE2C;SMURF1;CBLC;XIAP;UBE3B;UBE2Z;PML;UBE2L3;CDC20;ITCH;UBE2S;UBA1;UBE2M
Epithelial cell signaling in Helicobacter pylori infection	1968-10-01	0.0312667	0.137573	0	0	1.94265	6.73168	PAK1;SRC;ADAM10;ATP6V1H;RAC1;F11R;MAPK14;MET;RELA;EGFR
Viral myocarditis	1959-09-01	0.0323839	0.140482	0	0	2.01509	6.91195	CASP8;CD80;HLA-B;HLA-C;RAC1;HLA-F;HLA-G;CD55;EIF4G1
Bladder cancer	1941-07-01	0.0326364	0.139611	0	0	2.25537	7.71862	MAP2K1;SRC;ERBB2;KRAS;EGFR;TYMP;VEGFA
Prolactin signaling pathway	1970-10-01	0.0372779	0.157282	0	0	1.88715	6.2075	GSK3B;MAP2K1;SHC1;SRC;STAT1;IRF1;KRAS;PIK3CB;MAPK14;RELA
Rap1 signaling pathway	23/206	0.0393173	0.163645	0	0	1.47491	4.77294	VASP;FARP2;PRKCI;MAP2K1;RALA;SRC;PIK3CB;EFNA5;MAPK14;PRKCZ;EFNA4;EGFR;VEGFA;EFNA1;PARD6B;EFNA2;RRAS;ID1;PRKD2;KRAS;RAC1;MET;EPHA2
B cell receptor signaling pathway	1971-10-01	0.0405644	0.166585	0	0	1.86057	5.96287	GSK3B;IFITM1;MAP2K1;INPPL1;KRAS;PIK3CB;RAC1;BCL10;CARD11;RELA
Fc gamma R-mediated phagocytosis	1991-12-01	0.0414057	0.167802	0	0	1.74198	5.54706	VASP;MAP2K1;PAK1;MARCKSL1;MYO10;INPPL1;PIK3CB;WASL;RAC1;ASAP2;DNM2;ARF6
Leukocyte transendothelial migration	14/112	0.0432961	0.173185	0	0	1.65125	5.18443	VASP;ACTN1;ACTN4;PIK3CB;CLDN2;F11R;MAPK14;MYL12A;PTK2;CLDN4;CLDN23;CTNNA1;RAC1;EZR
Fanconi anemia pathway	1954-08-01	0.0490941	0.193859	0	0	1.95704	5.89856	MUS81;FANCI;RMI2;BRIP1;RAD51;FANCD2;UBE2T;FANCA

## Sheet: E-GEOD-28735
Term	Overlap	P-value	Adjusted P-value	Old P-value	Old Adjusted P-value	Odds Ratio	Combined Score	Genes
ECM-receptor interaction	1982-09-01	2.62e-08	8.08e-06	0	0	13.2236	230.834	LAMB3;ITGB4;ITGA3;ITGA2;LAMA3;ITGA11;FN1;SDC1;LAMC2
Focal adhesion	12/199	1.08e-07	1.66e-05	0	0	7.26524	116.553	LAMB3;ITGB4;ITGA3;ITGA2;ITGA11;LAMA3;CAPN2;FN1;LAMC2;FLNB;RAC1;MET
Arrhythmogenic right ventricular cardiomyopathy (ARVC)	1972-08-01	1.45e-07	1.49e-05	0	0	13.3869	210.802	CACNB3;JUP;ITGB4;ITGA3;ITGA2;LEF1;ITGA11;CTNNA1
Small cell lung cancer	1993-07-01	1.24e-05	0.000958	0	0	9.06853	102.426	LAMB3;ITGA3;ITGA2;LAMA3;FN1;LAMC2;BCL2L1
Pathways in cancer	15/530	3.72e-05	0.00229072	0	0	3.40987	34.7791	NQO1;EGLN3;JUP;LAMB3;ITGA3;ITGA2;LAMA3;LEF1;FN1;SLC2A1;LAMC2;CTNNA1;RAC1;MET;BCL2L1
PI3K-Akt signaling pathway	12/354	4.17e-05	0.00213804	0	0	4.08413	41.1934	LAMB3;ITGB4;ITGA3;ITGA2;ITGA11;LAMA3;FN1;LAMC2;RAC1;EFNA5;MET;BCL2L1
HIF-1 signaling pathway	6/100	0.000187	0.00822737	0	0	7.22892	62.0565	EGLN3;PGK1;SLC2A1;ALDOA;GAPDH;HK2
Central carbon metabolism in cancer	1965-05-01	0.000205	0.00788858	0	0	9.26784	78.7118	PKM;SLC2A1;SLC16A3;MET;HK2
Glycolysis / Gluconeogenesis	1968-05-01	0.000253	0.00867413	0	0	8.85897	73.3548	PKM;PGK1;ALDOA;GAPDH;HK2
Proteoglycans in cancer	8/201	0.000282	0.00867339	0	0	4.7953	39.2016	PLAU;ITGA2;FN1;SDC1;FLNB;RAC1;EZR;MET
Adherens junction	1972-05-01	0.000331	0.0092753	0	0	8.3668	67.0399	LEF1;CTNNA1;RAC1;NECTIN4;MET
p53 signaling pathway	1972-05-01	0.000331	0.00850236	0	0	8.3668	67.0399	CD82;IGFBP3;SFN;SERPINB5;BCL2L1
Bacterial invasion of epithelial cells	1974-05-01	0.000376	0.00891641	0	0	8.14067	64.1893	CLTB;CTNNA1;FN1;RAC1;MET
Human papillomavirus infection	10/330	0.000448	0.00985672	0	0	3.65097	28.1513	PRKCI;PKM;LAMB3;ITGB4;ITGA3;ITGA2;ITGA11;LAMA3;FN1;LAMC2
Hypertrophic cardiomyopathy (HCM)	1985-05-01	0.000712	0.0146251	0	0	7.08717	51.3612	CACNB3;ITGB4;ITGA3;ITGA2;ITGA11
Dilated cardiomyopathy (DCM)	1991-05-01	0.00097	0.0186794	0	0	6.61989	45.9277	CACNB3;ITGB4;ITGA3;ITGA2;ITGA11
Regulation of actin cytoskeleton	7/214	0.00210401	0.0381198	0	0	3.941	24.2919	ITGB4;ITGA3;ITGA2;ITGA11;FN1;RAC1;EZR
Renal cell carcinoma	1969-04-01	0.00260163	0.0445167	0	0	6.98446	41.5688	EGLN3;SLC2A1;RAC1;MET
Starch and sucrose metabolism	1936-03-01	0.00327905	0.0531552	0	0	10.0402	57.4317	PYGB;HK2;PGM2L1
Axon guidance	6/181	0.00406956	0.0626712	0	0	3.99388	21.9832	EFNB2;SEMA7A;UNC5B;RAC1;EFNA5;MET
Transcriptional misregulation in cancer	6/186	0.00464424	0.0681156	0	0	3.88651	20.8788	JUP;PLAU;IGFBP3;MET;RUNX2;BCL2L1
Protein digestion and absorption	1990-04-01	0.00672517	0.0941523	0	0	5.35475	26.7839	COL17A1;COL11A1;COL10A1;KCNN4
Amoebiasis	1996-04-01	0.00841602	0.112701	0	0	5.02008	23.984	LAMB3;LAMA3;FN1;LAMC2
Glycerophospholipid metabolism	1997-04-01	0.00872242	0.111938	0	0	4.96833	23.5591	PLPP4;LPCAT4;LPCAT2;MBOAT2
Hematopoietic cell lineage	1997-04-01	0.00872242	0.10746	0	0	4.96833	23.5591	ITGA3;ITGA2;CD9;CD55
Toxoplasmosis	4/113	0.0146461	0.1735	0	0	4.26485	18.0129	LAMB3;LAMA3;LAMC2;BCL2L1
Galactose metabolism	1931-02-01	0.0272016	0.3103	0	0	7.77303	28.0177	GALE;HK2
Insulin signaling pathway	4/137	0.0274627	0.302089	0	0	3.51772	12.646	PYGB;PRKCI;TRIP10;HK2
Fructose and mannose metabolism	1933-02-01	0.0305568	0.324534	0	0	7.30194	25.4704	ALDOA;HK2
Gastric cancer	4/149	0.035769	0.367228	0	0	3.23441	10.7728	JUP;LEF1;CTNNA1;MET
MAPK signaling pathway	6/295	0.0368079	0.365705	0	0	2.45048	8.09159	CACNB3;FLNB;IL1RAP;RAC1;EFNA5;MET
Neomycin, kanamycin and gentamicin biosynthesis	2020-05-01	0.0408206	0.392898	0	0	24.0964	77.0739	HK2
NF-kappa B signaling pathway	1995-03-01	0.0446615	0.416841	0	0	3.80469	11.8274	PLAU;CARD11;BCL2L1

## Sheet: E-GEOD-41368
Term	Overlap	P-value	Adjusted P-value	Old P-value	Old Adjusted P-value	Odds Ratio	Combined Score	Genes
Phagosome	62/152	5.93e-19	1.83e-16	0	0	3.32027	139.35	ITGB1;ITGAM;TFRC;ITGB5;NCF2;ITGB3;NCF4;ITGB2;ACTB;CTSS;ACTG1;COMP;SEC61A2;TUBA1C;FCGR3A;TUBA1B;TUBA1A;CTSL;MRC1;OLR1;ITGAV;RAC1;ATP6V1E1;HLA-DOA;HLA-DOB;HLA-DPA1;TUBB;ITGA2;STX7;CYBB;HLA-F;ATP6V1B2;ITGA5;TLR6;ATP6V0D1;PLA2R1;ATP6V0D2;ATP6V0C;TLR4;VAMP3;TLR2;HLA-DQB1;RAB7A;COLEC12;DYNC1I2;RAB5C;C1R;THBS2;THBS1;C3;HLA-DMA;HLA-DMB;CLEC7A;CD14;HLA-DQA1;ATP6V0A1;MSR1;M6PR;IGH;FCGR2A;HLA-DPB1;FCGR2B
Hematopoietic cell lineage	47/97	2.44e-18	3.75e-16	0	0	3.94413	159.958	CSF1R;ITGAM;TFRC;ITGB3;CD3G;CD1C;CD3E;CSF2RA;CD3D;CD1A;HLA-DMA;HLA-DMB;CD38;CD37;CD14;HLA-DOA;HLA-DOB;CD34;HLA-DQA1;CD55;HLA-DPA1;CR2;CR1;ITGA4;MME;IL1R1;ITGA3;IL1R2;ITGA2;IGH;CD2;IL1A;CD4;KITLG;IL7;IL1B;IL2RA;IL3RA;KIT;HLA-DPB1;CD9;ITGA5;IL7R;MS4A1;CD22;CD44;HLA-DQB1
Tuberculosis	66/179	2.24e-17	2.3e-15	0	0	3.00134	115.067	ITGAM;ITGB2;CTSS;PPP3CA;FCGR3A;CASP8;CASP10;CASP3;AKT3;MRC1;ITGAX;HLA-DOA;JAK2;HLA-DOB;CTSD;HLA-DPA1;FCER1G;CR1;APAF1;SYK;RIPK2;IFNGR1;IFNGR2;IL18;RHOA;TNFRSF1A;TLR1;IL1A;IFNG;IL1B;RFX5;TLR6;ATP6V0D1;PLA2R1;ATP6V0D2;ATP6V0C;TLR4;TLR2;HLA-DQB1;RAB7A;CAMK2D;RAB5C;BCL10;MALT1;C3;HLA-DMA;HLA-DMB;CLEC7A;CD14;HLA-DQA1;ATP6V0A1;CD74;TGFB2;TGFB1;TGFB3;STAT1;NFYB;IL10RA;IGH;MAPK14;NFKB1;FCGR2A;HLA-DPB1;FC…
Focal adhesion	70/199	4.47e-17	3.44e-15	0	0	2.86332	107.797	ITGB1;ITGB5;ITGB4;ITGB3;TNC;ILK;LAMC2;LAMC1;ACTB;MYLK;ACTG1;COMP;AKT3;RAC2;CAPN2;ITGAV;RAC1;ITGB6;PDGFRB;PDGFRA;PPP1R12A;ITGA4;PRKCB;ITGA3;ACTN1;HGF;ITGA2;ACTN4;RHOA;VAV1;COL4A2;PIK3CA;COL4A1;ITGA8;COL6A3;ITGA5;TLN1;MYL9;MET;VCL;BIRC3;ITGA9;ROCK1;LAMA2;LAMA4;LAMA3;PIK3R1;THBS2;THBS1;MYL12A;MYL12B;RAP1B;RAP1A;PDGFC;FLNA;FYN;PAK2;LAMB3;CAV1;FN1;VEGFC;LAMB1;IGF1;COL1A1;COL1A2;PARVG;ITGA11;ZYX;CTNNB1…
Leishmaniasis	39/74	4.53e-17	2.79e-15	0	0	4.29	161.443	ITGB1;ITGAM;NCF2;ITGB2;NCF4;PTGS2;C3;FCGR3A;HLA-DMA;HLA-DMB;HLA-DOA;JAK2;HLA-DOB;HLA-DQA1;HLA-DPA1;TGFB2;CR1;TGFB1;ITGA4;IFNGR1;PRKCB;TGFB3;STAT1;IFNGR2;CYBB;IGH;MAPK14;NFKB1;NFKBIA;IL1A;FCGR2A;IFNG;IL1B;HLA-DPB1;PTPN6;TLR4;MYD88;TLR2;HLA-DQB1
Amoebiasis	44/96	4.07e-16	2.09e-14	0	0	3.73084	132.208	CXCL8;ITGAM;RAB5C;LAMA2;LAMA4;ITGB2;LAMA3;LAMC2;CXCL1;LAMC1;PIK3R1;GNA14;GNA15;CASP3;CD14;TGFB2;TGFB1;LAMB3;IL1R1;PRKCB;TGFB3;IL1R2;ACTN1;FN1;SERPINB9;LAMB1;ACTN4;IGH;NFKB1;COL1A1;COL3A1;PLCB4;COL1A2;GNAL;PIK3CA;IFNG;COL4A2;COL4A1;IL1B;GNAQ;TLR4;VCL;TLR2;RAB7A
Pathways in cancer	132/530	5.11e-16	2.25e-14	0	0	2.02732	71.3821	RB1;FGF1;ETS1;FGF7;EDNRA;RASSF5;AKT3;PIM2;IL13RA1;IFNAR2;PDGFRB;PDGFRA;PRKCB;HGF;F2R;MITF;RBX1;RUNX1;COL4A2;COL4A1;IL6ST;CSF1R;MGST3;LPAR1;PIK3R1;STK4;HIF1A;CSF2RA;RASGRP1;RASGRP3;PLCG2;ABL1;HMOX1;PMAIP1;WNT2;SMAD2;TGFB2;TGFB1;JUP;GADD45A;TGFB3;FZD7;FN1;IGF1;GNG12;NFKB1;NFKBIA;LPAR6;IL7;GNAQ;GNB1;GNB4;GRB2;IL7R;CALM2;BCL2L1;NFE2L2;ITGB1;CXCL8;SLC2A1;LAMC2;LAMC1;BRCA2;GLI3;CASP8;CASP3;RAC2;ITGAV;R…
Regulation of actin cytoskeleton	71/214	9.15e-16	3.52e-14	0	0	2.70066	93.5182	CYFIP2;ITGB1;ITGAM;ITGB5;ITGB4;ARPC1B;ITGB3;ITGB2;FGF1;ITGAL;ACTB;MYLK;ACTG1;FGF7;CFL1;RAC2;ITGAX;PIP4K2A;ITGAV;RAC1;ITGB6;PDGFRB;PDGFRA;PPP1R12A;ITGA4;ITGA3;ACTN1;ITGA2;F2R;ACTN4;RHOA;VAV1;TIAM1;MRAS;PIK3CA;ITGA8;MYH9;ITGA5;PFN1;EZR;MYL9;VCL;ARHGEF6;ITGA9;ROCK1;LPAR1;CXCR4;PIK3R1;IQGAP1;MYL12A;MYL12B;SLC9A1;GNA13;SCIN;PDGFC;PIP5K1A;NCKAP1L;PAK2;MYH10;WASF2;FN1;MSN;ARPC5;GNG12;SSH2;DIAPH2;ABI2;AR…
Rheumatoid arthritis	42/91	1.39e-15	4.77e-14	0	0	3.75693	128.515	CD86;CXCL8;CD80;ITGB2;CXCL1;ITGAL;CXCL5;TNFSF13B;ICAM1;HLA-DMA;HLA-DMB;CTSL;CTSK;CCL5;CCL3;CTLA4;ATP6V1E1;HLA-DOA;HLA-DOB;HLA-DQA1;HLA-DPA1;ATP6V0A1;TGFB2;TGFB1;MMP1;TGFB3;CCL20;IL18;IGH;IL1A;IFNG;IL1B;ATP6V1B2;CD28;HLA-DPB1;TEK;ATP6V0D1;TLR4;ATP6V0C;ATP6V0D2;TLR2;HLA-DQB1
Viral myocarditis	32/59	1e-14	3.08e-13	0	0	4.41492	142.322	CD86;LAMA2;CD80;ITGB2;ITGAL;ACTB;ACTG1;ICAM1;HLA-DMA;CASP8;SGCD;HLA-DMB;SGCB;CASP3;RAC2;ABL1;ABL2;FYN;RAC1;HLA-DOA;HLA-DOB;HLA-DQA1;CD55;HLA-DPA1;CAV1;IGH;HLA-F;CD40LG;CD28;HLA-DPB1;EIF4G3;HLA-DQB1
Leukocyte transendothelial migration	46/112	1.46e-14	4.08e-13	0	0	3.34322	106.514	ITGB1;ITK;ITGAM;ROCK1;NCF2;NCF4;ITGB2;CXCR4;PIK3R1;THY1;ITGAL;ACTB;MYL12A;GNAI1;ACTG1;ICAM1;MYL12B;GNAI2;RAP1B;CDH5;RAP1A;RASSF5;PLCG2;RAC2;CTNNA1;RAC1;JAM3;VCAM1;ITGA4;PRKCB;ACTN1;MMP2;CYBB;MSN;RHOH;ACTN4;MAPK14;RHOA;VAV1;PIK3CA;PECAM1;CLDN18;CTNNB1;EZR;MYL9;VCL
Staphylococcus aureus infection	34/68	3.59e-14	9.22e-13	0	0	4.07	125.997	C1QB;C1QA;ITGAM;SELPLG;CFH;C1S;C1R;ITGB2;CFI;PTAFR;FPR1;FPR3;FPR2;ITGAL;ICAM1;C2;C3;C4A;FCGR3A;HLA-DMA;HLA-DMB;C3AR1;HLA-DOA;HLA-DOB;HLA-DQA1;HLA-DPA1;IGH;SELP;FCGR2A;HLA-DPB1;FCGR2B;CFB;HLA-DQB1;C1QC
Osteoclast differentiation	49/127	3.75e-14	8.89e-13	0	0	3.14063	97.0888	NCF2;ITGB3;NCF4;SIRPG;FHL2;TREM2;PPP3CA;FCGR3A;CTSK;AKT3;RAC1;IFNAR2;SYK;IL1R1;IFNGR1;IFNGR2;MITF;GAB2;TGFBR1;TNFRSF1A;TGFBR2;IL1A;TYROBP;PIK3CA;IFNG;IL1B;BTK;LCP2;PPARG;IRF9;CSF1R;TNFRSF11B;PIK3R1;PLCG2;FYN;TGFB2;TGFB1;STAT1;STAT2;NFATC2;MAPK14;LILRB4;NFKB1;NFKBIA;TEC;FCGR2A;CAMK4;GRB2;FCGR2B
Platelet activation	48/124	5.89e-14	1.3e-12	0	0	3.15097	95.9884	ITGB1;ROCK1;ITGB3;SNAP23;ITPR1;ADCY3;ITPR3;PIK3R1;RASGRP1;ACTB;MYL12A;PIK3CG;GNAI1;ACTG1;MYLK;MYL12B;GNAI2;PTGS1;RAP1B;GNA13;RAP1A;AKT3;PLCG2;FYN;PRKG1;LYN;PRKCI;PPP1R12A;FCER1G;SYK;ITGA2;F2R;PLA2G4A;MAPK14;RHOA;COL1A1;APBB1IP;COL3A1;COL1A2;PLCB4;FCGR2A;PIK3CA;GNAQ;TBXAS1;BTK;LCP2;TLN1;FERMT3
Complement and coagulation cascades	36/79	2.39e-13	4.9e-12	0	0	3.70937	107.81	C1QB;C1QA;SERPINA1;ITGAM;CFH;C1S;C1R;PROS1;SERPINE1;ITGB2;CFI;F13A1;PLAT;C4BPB;TFPI;C2;C3;C4A;PLAU;C3AR1;ITGAX;VSIG4;A2M;CD55;CR2;CR1;SERPINB2;F2R;PLAUR;F3;F5;PROCR;SERPING1;CFB;F2RL2;C1QC
Chagas disease (American trypanosomiasis)	42/103	2.71e-13	5.22e-12	0	0	3.31923	96.0451	C1QB;C1QA;CXCL8;SERPINE1;PPP2R2A;CD3G;PIK3R1;CD3E;CD3D;GNAI1;GNAI2;C3;GNA14;GNA15;CASP8;CCL5;AKT3;CCL3;SMAD2;TGFB2;TGFB1;TGFB3;IFNGR1;IFNGR2;MAPK14;NFKB1;TGFBR1;TNFRSF1A;TGFBR2;NFKBIA;GNAL;PLCB4;PIK3CA;IFNG;GNAQ;IL1B;FAS;TLR6;TLR4;MYD88;TLR2;C1QC
Toxoplasmosis	44/113	5.11e-13	9.26e-12	0	0	3.16956	89.7049	ITGB1;LAMA2;LAMA4;LAMA3;LY96;LAMC2;LAMC1;PIK3CG;GNAI1;GNAI2;HLA-DMA;CASP8;HLA-DMB;CASP3;ALOX5;AKT3;HLA-DOA;JAK2;HLA-DOB;HLA-DQA1;HLA-DPA1;TGFB2;TGFB1;LAMB3;TGFB3;IFNGR1;STAT1;IFNGR2;IL10RA;STAT3;LAMB1;MAPK14;NFKB1;TNFRSF1A;NFKBIA;CD40LG;IFNG;HLA-DPB1;TLR4;MYD88;BCL2L1;BIRC3;TLR2;HLA-DQB1
Malaria	27/49	7.31e-13	1.25e-11	0	0	4.48531	125.337	CXCL8;LRP1;KLRB1;ITGB2;ITGAL;THBS2;THBS1;ICAM1;COMP;KLRC4-KLRK1;TGFB2;CR1;TGFB1;VCAM1;TGFB3;HGF;IL18;SELE;SELP;CD40LG;IFNG;IL1B;PECAM1;TLR4;MET;MYD88;TLR2
Chemokine signaling pathway	60/190	1.71e-12	2.78e-11	0	0	2.57053	69.6434	ITK;CXCL9;CXCL8;CXCL1;ARRB2;CXCL13;CXCL14;CXCL5;PIK3CG;CXCL16;PREX1;AKT3;RAC2;CCR7;CCR6;RAC1;JAK2;CCR4;PRKCB;RHOA;VAV1;TIAM1;PLCB4;PIK3CA;ELMO1;DOCK2;CCL13;CCL11;ROCK1;ADCY3;CXCR4;PIK3R1;CXCR6;GNAI1;GNAI2;RAP1B;RAP1A;GNG2;GRK5;CCL5;CCL4;CCL3;CCL19;CCL18;LYN;CCR1;CCL22;CCL21;CCL20;STAT1;STAT2;STAT3;GNG12;NFKB1;NFKBIA;CXCL10;GNB1;GNB4;GRB2;KRAS
Pertussis	34/76	2.11e-12	3.25e-11	0	0	3.64158	97.901	ITGB1;C1QB;C1QA;CXCL8;ITGAM;C1S;C1R;ITGB2;LY96;NOD1;C4BPB;CXCL5;GNAI1;GNAI2;C2;C3;C4A;CASP3;CFL1;CASP1;CD14;MAPK14;RHOA;NFKB1;IL1A;IL1B;IRF1;IRF8;SERPING1;ITGA5;TLR4;CALM2;MYD88;C1QC
Proteoglycans in cancer	62/201	2.32e-12	3.4e-11	0	0	2.51085	67.2631	ITGB1;ITGB5;ITGB3;ACTB;ACTG1;CTSL;PLAU;CASP3;AKT3;TIMP3;ITGAV;RAC1;PPP1R12A;PRKCB;HGF;MMP2;ITGA2;PLAUR;ANK2;RHOA;DCN;TIAM1;MRAS;CTTN;PIK3CA;HCLS1;ITGA5;EZR;TLR4;MET;CD44;TLR2;HBEGF;CAMK2D;ROCK1;ITPR1;ITPR3;PIK3R1;IQGAP1;CBL;HIF1A;THBS1;SLC9A1;PLCG2;FLNA;WNT2;SMAD2;TGFB2;TGFB1;LUM;FZD7;CAV1;STAT3;FN1;MSN;IGF1;MAPK14;CTNNB1;FAS;GRB2;PTPN6;KRAS
Cell adhesion molecules (CAMs)	50/145	3.13e-12	4.38e-11	0	0	2.8069	74.3574	CD86;ITGB1;ITGAM;CD80;ITGB2;PTPRM;ITGAL;ICAM1;CDH5;CDH3;CDH2;CTLA4;ITGAV;HLA-DOA;HLA-DOB;CD34;HLA-DPA1;ITGA4;PDCD1LG2;HLA-F;VCAN;ITGA8;PECAM1;CLDN18;CD226;ITGA9;HLA-DQB1;CD274;SELPLG;HLA-DMA;HLA-DMB;NCAM2;CD58;ICOS;HLA-DQA1;MPZL1;JAM3;VCAM1;NLGN4X;SELE;SELP;CD2;CD4;PTPRC;CD40LG;SELL;CNTN1;CD28;HLA-DPB1;CD22
Rap1 signaling pathway	62/206	7.57e-12	1.01e-10	0	0	2.44991	62.7337	ITGB1;DOCK4;ITGAM;ITGB3;ITGB2;SIPA1L2;FGF1;ITGAL;ACTB;ACTG1;FGF7;SIPA1L1;RASSF5;AKT3;RAC2;RAC1;PDGFRB;PDGFRA;PRKCI;PRKCB;HGF;F2R;RHOA;APBB1IP;TIAM1;MRAS;PLCB4;PIK3CA;PRKD3;KIT;LCP2;PRKD1;TLN1;PFN1;MET;SKAP1;CSF1R;RALA;RALB;LPAR1;FPR1;ADCY3;PIK3R1;EFNA5;THBS1;GNAI1;GNAI2;RASGRP3;RAP1B;RAP1A;PDGFC;FYB1;ANGPT2;VEGFC;IGF1;MAPK14;KITLG;GNAQ;CTNNB1;KRAS;TEK;CALM2
Inflammatory bowel disease (IBD)	30/65	1.56e-11	2e-10	0	0	3.75693	93.4834	GATA3;IL2RG;HLA-DMA;HLA-DMB;STAT4;STAT6;HLA-DOA;HLA-DOB;HLA-DQA1;HLA-DPA1;SMAD2;TGFB2;TGFB1;IFNGR1;TGFB3;STAT1;IFNGR2;STAT3;IL18;NFKB1;IL1A;MAF;IFNG;IL1B;HLA-DPB1;TLR5;TLR4;IL18R1;TLR2;HLA-DQB1
Influenza A	54/171	2.19e-11	2.69e-10	0	0	2.57053	63.097	CXCL8;ADAR;ACTB;ACTG1;ICAM1;IFIH1;TBK1;XPO1;AKT3;TNFSF10;CASP1;KPNA2;HLA-DOA;JAK2;HLA-DOB;AGFG1;HLA-DPA1;IFNAR2;RSAD2;PRKCB;DDX58;IFNGR1;IFNGR2;IL18;TNFRSF1A;IL1A;OAS1;PIK3CA;IFNG;OAS2;IL1B;TLR7;TLR4;IRF9;HLA-DQB1;RNASEL;TMPRSS4;PIK3R1;HLA-DMA;HLA-DMB;CCL5;HLA-DQA1;IVNS1ABP;STAT1;STAT2;MX1;EIF2AK2;MAPK14;NFKB1;NFKBIA;CXCL10;HLA-DPB1;FAS;MYD88
Epstein-Barr virus infection	60/201	2.39e-11	2.84e-10	0	0	2.42985	59.4227	RB1;TNFAIP3;CD3G;CD3E;ITGAL;CD3D;ICAM1;TBK1;CASP8;CASP3;AKT3;PSMD1;RAC1;HLA-DOA;B2M;HLA-DOB;HLA-DPA1;IFNAR2;ENTPD1;CR2;SYK;APAF1;DDX58;HLA-F;TAPBP;CCNA2;OAS1;PIK3CA;TRAF3;OAS2;BTK;CD44;IRF9;TLR2;HLA-DQB1;PIK3R1;HLA-DMA;HLA-DMB;PLCG2;E2F3;CD58;HLA-DQA1;LYN;GADD45A;STAT1;STAT2;STAT3;EIF2AK2;IGH;MAPK14;NFKB1;NFKBIA;CXCL10;PSMC4;NEDD4;PSMC2;HLA-DPB1;FAS;VIM;MYD88
AGE-RAGE signaling pathway in diabetic complications	38/100	4.6e-11	5.25e-10	0	0	3.0932	73.6258	CXCL8;SERPINE1;PIK3R1;ICAM1;CASP3;AKT3;PLCG2;RAC1;JAK2;SMAD2;TGFB2;TGFB1;VCAM1;PRKCB;TGFB3;STAT1;MMP2;STAT3;FN1;CYBB;VEGFC;MAPK14;SELE;F3;NFKB1;TGFBR1;TGFBR2;COL1A1;IL1A;COL3A1;COL1A2;PLCB4;COL4A2;PIK3CA;COL4A1;IL1B;NOX4;KRAS
Arrhythmogenic right ventricular cardiomyopathy (ARVC)	31/72	6.62e-11	7.28e-10	0	0	3.50473	82.1466	ITGB1;ITGB5;LAMA2;ITGB4;ITGB3;LEF1;ATP2A2;CACNA1C;ACTB;SLC8A1;ACTG1;GJA1;SGCD;CDH2;SGCB;LMNA;CTNNA1;ITGAV;ITGB6;TCF7L2;ITGA4;JUP;ITGA3;CACNA2D1;ITGA2;ITGA11;ITGA8;CTNNB1;ITGA5;DSC2;ITGA9
Th17 cell differentiation	39/107	1.12e-10	1.19e-09	0	0	2.96692	67.9789	CD3G;AHR;IL1RAP;GATA3;CD3E;IL2RG;HIF1A;CD3D;PPP3CA;HLA-DMA;HLA-DMB;STAT6;HLA-DOA;JAK2;HLA-DOB;HLA-DQA1;HLA-DPA1;SMAD2;TGFB1;IL1R1;IFNGR1;STAT1;IFNGR2;STAT3;NFATC2;MAPK14;NFKB1;TGFBR1;RUNX1;TGFBR2;NFKBIA;CD4;IFNG;IRF4;IL1B;IL2RA;HLA-DPB1;IL6ST;HLA-DQB1
ECM-receptor interaction	33/82	1.44e-10	1.48e-09	0	0	3.27586	74.2306	ITGB1;ITGB5;LAMA2;ITGB4;ITGB3;LAMA4;LAMA3;TNC;LAMC2;LAMC1;HMMR;THBS2;THBS1;COMP;ITGAV;ITGB6;ITGA4;LAMB3;ITGA3;ITGA2;FN1;LAMB1;COL1A1;COL1A2;COL4A2;COL4A1;ITGA11;ITGA8;COL6A3;ITGA5;CD47;CD44;ITGA9
Kaposi sarcoma-associated herpesvirus infection	55/186	2.38e-10	2.37e-09	0	0	2.40699	53.3333	RB1;CD86;CXCL8;CXCL1;PIK3CG;ICAM1;PREX1;PPP3CA;ZFP36;TBK1;CASP8;CASP3;AKT3;RAC1;JAK2;CCR4;IFNAR2;SYK;IFNGR1;HLA-F;TNFRSF1A;CD200R1;PIK3CA;TRAF3;MAPKAPK2;IL6ST;IRF9;ITPR1;ITPR3;PIK3R1;PTGS2;HIF1A;C3;GNG2;PLCG2;E2F3;LYN;CCR1;ANGPT2;STAT1;STAT2;STAT3;EIF2AK2;NFATC2;GNG12;MAPK14;NFKB1;NFKBIA;CLEC2B;GNB1;GNB4;FAS;CTNNB1;KRAS;CALM2
PI3K-Akt signaling pathway	85/354	6.19e-10	5.96e-09	0	0	1.95452	41.4411	ITGB1;ITGB5;YWHAB;ITGB4;ITGB3;TNC;PPP2R2A;LAMC2;BRCA1;LAMC1;FGF1;AREG;PIK3CG;COMP;FGF7;MYB;AKT3;ITGAV;RAC1;ITGB6;JAK2;YWHAH;PDGFRB;IFNAR2;PDGFRA;SYK;ITGA4;ITGA3;HGF;ITGA2;F2R;OSMR;YWHAZ;EREG;COL4A2;PIK3CA;COL4A1;KIT;IL3RA;ITGA8;COL6A3;ITGA5;EIF4E2;TLR4;MET;TLR2;CREB5;ITGA9;CSF1R;LAMA2;LAMA4;LAMA3;LPAR1;PIK3R1;EFNA5;IL2RG;THBS2;THBS1;GNG2;PPP2R3C;PDGFC;MCL1;ANGPT2;LAMB3;FN1;VEGFC;LAMB1;IGF1;IGH;GN…
Salmonella infection	33/86	6.35e-10	5.93e-09	0	0	3.12349	66.148	DYNC1I2;CXCL8;ROCK1;ARPC1B;CXCL1;ACTB;ACTG1;CCL4;CASP1;CCL3;FLNA;RAC1;CD14;WASF2;MYH10;IFNGR1;IFNGR2;RHOG;IL18;ARPC5;MAPK14;NFKB1;IL1A;IFNG;ARPC2;ARPC3;IL1B;MYH9;TLR5;PFN1;TLR4;MYD88;RAB7A
NF-kappa B signaling pathway	35/95	7.11e-10	6.44e-09	0	0	2.99895	63.1693	CCL13;CXCL8;BCL2A1;TNFAIP3;LY96;BCL10;PTGS2;MALT1;TNFSF13B;ICAM1;PLAU;CCL4;PLCG2;CD14;CCL19;LYN;VCAM1;SYK;CCL21;IL1R1;DDX58;PRKCB;IGH;NFKB1;TNFRSF1A;NFKBIA;CD40LG;TRAF3;IL1B;BTK;TLR4;CARD11;MYD88;BIRC3;BCL2L1
Lysosome	41/123	8.9e-10	7.83e-09	0	0	2.71334	56.5463	CTSZ;HEXA;CLTB;AP4E1;GNS;LITAF;CTSS;AP3M2;CTSO;GNPTAB;GM2A;CTSL;LAMP3;CTSK;PSAP;AP1S2;SLC17A5;IDS;CTSH;AP1S3;CTSE;CTSD;CTSC;ATP6V0A1;CTSB;CTSA;FUCA1;M6PR;LAPTM5;NAGA;GALC;NPC1;GLB1;PPT1;TPP1;ATP6V0D1;CD68;ATP6V0D2;ATP6V0C;GLA;LGMN
Pathogenic Escherichia coli infection	25/55	1.15e-09	9.8e-09	0	0	3.7	76.1739	ITGB1;ROCK1;ARPC1B;LY96;ACTB;ACTG1;TUBA1C;TUBA1B;TUBA1A;ABL1;FYN;CD14;NCK1;TUBB;ARPC5;YWHAZ;RHOA;CTTN;ARPC2;ARPC3;HCLS1;CTNNB1;TLR5;EZR;TLR4
NOD-like receptor signaling pathway	52/178	1.17e-09	9.77e-09	0	0	2.37798	48.8986	CXCL8;TNFAIP3;CXCL1;ANTXR2;ANTXR1;PANX1;TBK1;CASP8;CASP5;NAMPT;CASP1;DNM1L;CTSB;IFNAR2;GBP5;RIPK2;IL18;CYBB;TMEM173;RHOA;AIM2;PLCB4;OAS1;TRAF3;OAS2;IL1B;CARD16;TLR4;IRF9;BIRC3;RNASEL;ITPR1;ITPR3;NOD1;TXN;TANK;IFI16;CCL5;GBP2;GBP4;GBP3;STAT1;STAT2;NEK7;CARD6;ERBIN;MAPK14;NFKB1;NFKBIA;MYD88;MCU;BCL2L1
B cell receptor signaling pathway	29/71	1.23e-09	9.96e-09	0	0	3.32479	68.2159	IFITM1;DAPP1;PIK3R1;BCL10;MALT1;RASGRP3;PPP3CA;INPP5D;AKT3;RAC2;PLCG2;RAC1;LYN;CR2;SYK;PRKCB;NFATC2;IGH;VAV1;NFKB1;NFKBIA;PIK3CA;BTK;PTPN6;KRAS;GRB2;FCGR2B;CARD11;CD22
Cytokine-cytokine receptor interaction	73/294	2.13e-09	1.68e-08	0	0	2.02116	40.3595	CXCL9;CXCL8;BMPR2;CXCL1;IL1RAP;CXCL13;CXCL14;CXCL5;CXCL16;TNFSF13B;TNFSF10;CCR7;CCR6;CCR4;IL13RA1;ACVR1;IFNAR2;IL1R1;IFNGR1;IL1R2;IFNGR2;IL18;IL16;OSMR;TGFBR1;TNFRSF1A;TGFBR2;IL1A;IFNG;IL1B;IFNE;IL3RA;IFNK;IL6ST;TNFRSF21;CCL13;CSF1R;CCL11;CXCR4;TNFRSF11B;CXCR6;IL2RG;CSF2RA;CCL5;CCL4;CCL3;TNFRSF17;CCL19;CCL18;CCR1;TGFB2;CCL22;TGFB1;CCL21;TNFSF15;CCL20;TGFB3;IL10RA;TNFRSF9;LIF;INHBA;BMP6;TNFRSF10D;…
T cell receptor signaling pathway	35/101	4.69e-09	3.61e-08	0	0	2.82079	54.0951	ITK;CBLB;CD3G;PIK3R1;BCL10;CD3E;RASGRP1;CD3D;MALT1;PPP3CA;AKT3;CTLA4;MAP3K8;FYN;ICOS;PAK2;NCK1;NFATC2;MAPK14;NFKB1;RHOA;VAV1;NFKBIA;CD4;PTPRC;TEC;CD40LG;PIK3CA;IFNG;CD28;GRB2;LCP2;PTPN6;KRAS;CARD11
Apoptosis	43/143	1.21e-08	9.12e-08	0	0	2.44769	44.614	BCL2A1;CTSZ;ITPR1;ITPR3;PIK3R1;ACTB;CTSS;ACTG1;LMNB1;TUBA1C;CTSO;TUBA1B;CASP8;TUBA1A;CASP10;CTSL;CTSK;CASP3;AKT3;LMNA;CAPN2;TNFSF10;PMAIP1;CTSH;CTSD;SPTAN1;CTSC;MCL1;CTSB;PARP4;APAF1;GADD45A;PTPN13;NFKB1;TNFRSF1A;NFKBIA;PIK3CA;IL3RA;BIRC5;FAS;KRAS;BCL2L1;BIRC3
HIF-1 signaling pathway	34/100	1.35e-08	9.89e-08	0	0	2.7676	50.1539	CAMK2D;PFKFB3;TFRC;SERPINE1;SLC2A1;ENO1;PIK3R1;ENO2;HIF1A;HK2;HK1;LDHA;AKT3;PLCG2;PGK1;HMOX1;TIMP1;EGLN3;ANGPT2;PRKCB;IFNGR1;IFNGR2;STAT3;CYBB;IGF1;NFKB1;RBX1;PIK3CA;IFNG;TEK;EIF4E2;ALDOA;TLR4;GAPDH
Dilated cardiomyopathy (DCM)	32/91	1.41e-08	1.01e-07	0	0	2.86242	51.7367	ITGB1;ITGB5;LAMA2;ITGB4;ITGB3;ATP2A2;ADCY3;CACNA1C;ACTB;SLC8A1;ACTG1;SGCD;PLN;SGCB;LMNA;ITGAV;ITGB6;TGFB2;TGFB1;ITGA4;TPM4;ITGA3;TGFB3;TPM2;CACNA2D1;ITGA2;IGH;IGF1;ITGA11;ITGA8;ITGA5;ITGA9
Human T-cell leukemia virus 1 infection	57/219	2.05e-08	1.43e-07	0	0	2.11863	37.5098	RB1;CRTC3;ITGB2;SLC2A1;CD3G;CD3E;ITGAL;CD3D;ETS1;ETS2;ICAM1;PPP3CA;ZFP36;XPO1;PTTG1;CHEK1;AKT3;CDC27;HLA-DOA;B2M;HLA-DOB;HLA-DPA1;MMP7;IL1R1;IL1R2;HLA-F;TGFBR1;TNFRSF1A;TGFBR2;CCNA2;PIK3CA;TLN1;HLA-DQB1;CREB5;ADCY3;PIK3R1;IL2RG;CCNB2;HLA-DMA;HLA-DMB;E2F3;HLA-DQA1;SMAD2;EGR2;TGFB2;TGFB1;NFYB;TGFB3;NFATC2;NFKB1;NFKBIA;CD4;IL2RA;HLA-DPB1;KRAS;MAD2L1;BCL2L1
Measles	41/138	3.83e-08	2.62e-07	0	0	2.41841	41.2982	TNFAIP3;CBLB;CD3G;ADAR;PIK3R1;CD3E;IL2RG;CD3D;IFIH1;TBK1;CASP8;CASP3;AKT3;SLAMF1;IFNAR2;APAF1;DDX58;STAT1;STAT2;MX1;STAT3;MSN;EIF2AK2;NFKB1;NFKBIA;IL1A;OAS1;PIK3CA;TRAF3;OAS2;IL1B;IL2RA;CD28;FAS;TLR7;FCGR2B;TLR4;MYD88;IRF9;BCL2L1;TLR2
Adherens junction	27/72	3.98e-08	2.67e-07	0	0	3.0525	52.0111	LEF1;PTPRM;PTPRJ;IQGAP1;ACTB;ACTG1;RAC2;CTNNA1;FYN;RAC1;WASF2;SMAD2;PTPN1;TCF7L2;ACTN1;LMO7;ACTN4;RHOA;TGFBR1;TGFBR2;FER;PTPRB;SNAI2;CTNNB1;PTPN6;MET;VCL
C-type lectin receptor signaling pathway	34/104	4.11e-08	2.69e-07	0	0	2.66116	45.2602	ITPR1;CBLB;ITPR3;PIK3R1;BCL10;PTGS2;MALT1;PPP3CA;CASP8;CLEC7A;AKT3;PLCG2;CASP1;EGR2;FCER1G;CCL22;SYK;STAT1;STAT2;NFATC2;MAPK14;NFKB1;RHOA;NFKBIA;CLEC4D;MRAS;PIK3CA;CLEC6A;IL1B;IRF1;MAPKAPK2;KRAS;CALM2;IRF9
Human cytomegalovirus infection	57/225	5.69e-08	3.65e-07	0	0	2.06214	34.401	RB1;CXCL8;ITGB3;CGAS;PPP3CA;TBK1;CASP8;CASP3;AKT3;RAC2;ITGAV;RAC1;B2M;PDGFRA;IL1R1;PRKCB;HLA-F;TMEM173;RHOA;TNFRSF1A;TAPBP;PLCB4;PIK3CA;IL1B;CREB5;ROCK1;PTGER2;ITPR1;ADCY3;CXCR4;ITPR3;PIK3R1;PTGS2;GNAI1;GNAI2;GNA13;GNG2;CCL5;CCL4;CCL3;E2F3;CCR1;IL10RA;STAT3;NFATC2;GNG12;MAPK14;NFKB1;NFKBIA;GNAQ;GNB1;GNB4;CTNNB1;FAS;GRB2;KRAS;CALM2
Shigellosis	25/65	7.02e-08	4.42e-07	0	0	3.13077	51.5681	ITGB1;CXCL8;ROCK1;ARPC1B;NOD1;ACTB;ACTG1;ABL1;RAC1;WASF2;RIPK2;RHOG;ARPC5;MAPK14;NFKB1;NFKBIA;CTTN;ARPC2;ARPC3;ELMO1;HCLS1;ITGA5;PFN1;CD44;VCL
Ras signaling pathway	58/232	7.19e-08	4.43e-07	0	0	2.035	33.4705	RASGRF2;FGF1;ETS1;ETS2;FGF7;TBK1;RASSF5;AKT3;RAC2;RAC1;PDGFRB;PDGFRA;PRKCB;HGF;PLA2G4A;GAB2;RHOA;TIAM1;MRAS;PIK3CA;RASA3;KIT;RASA2;MET;CSF1R;RALA;RAB5C;RALB;PIK3R1;RASAL2;EFNA5;STK4;RASGRP1;RASGRP3;RAP1B;RAP1A;GNG2;PDGFC;PLCG2;ABL1;ABL2;PAK2;ANGPT2;PLA2G2A;VEGFC;IGF1;GNG12;NFKB1;KITLG;GNB1;REL;GNB4;GRB2;KRAS;TEK;RGL1;CALM2;BCL2L1
Bacterial invasion of epithelial cells	27/74	7.77e-08	4.69e-07	0	0	2.97	48.6211	ITGB1;ARPC1B;CLTB;ILK;PIK3R1;CBL;ACTB;ACTG1;CTNNA1;RAC1;WASF2;CAV1;RHOG;FN1;ARPC5;RHOA;DNM3;PIK3CA;CTTN;ARPC2;ARPC3;ELMO1;HCLS1;CTNNB1;ITGA5;MET;VCL
Human immunodeficiency virus 1 infection	54/212	1.04e-07	6.14e-07	0	0	2.0734	33.3435	CGAS;CD3G;CD3E;CD3D;PPP3CA;TBK1;CASP8;CASP3;CHEK1;AKT3;CFL1;AP1S2;RAC2;AP1S3;RAC1;B2M;PRKCB;HLA-F;TMEM173;RBX1;TNFRSF1A;TAPBP;PIK3CA;TLR4;TLR2;ITPR1;CXCR4;ITPR3;PIK3R1;SAMHD1;GNAI1;GNAI2;CCNB2;GNG2;PLCG2;PAK2;APOBEC3C;APOBEC3D;APOBEC3G;NFATC2;GNG12;MAPK14;NFKB1;BST2;NFKBIA;CD4;GNAQ;GNB1;GNB4;FAS;KRAS;CALM2;MYD88;BCL2L1
Hypertrophic cardiomyopathy (HCM)	29/85	1.41e-07	8.22e-07	0	0	2.77718	43.8	ITGB1;ITGB5;LAMA2;ITGB4;ITGB3;ATP2A2;CACNA1C;ACTB;SLC8A1;ACTG1;SGCD;SGCB;LMNA;ITGAV;ITGB6;TGFB2;TGFB1;ITGA4;TPM4;ITGA3;TGFB3;TPM2;CACNA2D1;ITGA2;IGF1;ITGA11;ITGA8;ITGA5;ITGA9
Toll-like receptor signaling pathway	33/104	1.44e-07	8.22e-07	0	0	2.58289	40.6865	CD86;CXCL9;CXCL8;CD80;LY96;PIK3R1;TBK1;CASP8;CTSK;CCL5;AKT3;CCL4;CCL3;MAP3K8;CD14;RAC1;IFNAR2;STAT1;MAPK14;NFKB1;NFKBIA;TLR1;CXCL10;PIK3CA;TRAF3;IL1B;TLR8;TLR7;TLR6;TLR5;TLR4;MYD88;TLR2
Fluid shear stress and atherosclerosis	40/139	1.46e-07	8.17e-07	0	0	2.34245	36.8723	BMPR2;NCF2;MGST3;ITGB3;GSTP1;PLAT;PIK3R1;TXN;ACTB;ACTG1;ICAM1;CDH5;CTSL;AKT3;RAC2;HMOX1;ITGAV;RAC1;ACVR1;MEF2A;NQO1;MEF2C;VCAM1;IL1R1;IL1R2;CAV1;MMP2;MAPK14;SELE;NFKB1;RHOA;TNFRSF1A;IL1A;PIK3CA;IFNG;IL1B;PECAM1;CTNNB1;CALM2;NFE2L2
Intestinal immune network for IgA production	20/48	3.06e-07	1.68e-06	0	0	3.39167	50.8713	CD86;PIGR;TGFB1;ITGA4;CD80;CXCR4;IGH;TNFSF13B;HLA-DMA;HLA-DMB;CD40LG;CD28;HLA-DPB1;TNFRSF17;ICOS;HLA-DOA;HLA-DOB;HLA-DQA1;HLA-DPA1;HLA-DQB1
Small cell lung cancer	30/93	3.51e-07	1.9e-06	0	0	2.62581	39.0239	RB1;ITGB1;LAMA2;LAMA4;LAMA3;LAMC2;LAMC1;PIK3R1;PTGS2;CASP3;AKT3;ITGAV;E2F3;APAF1;LAMB3;ITGA3;GADD45A;ITGA2;FN1;LAMB1;NFKB1;NFKBIA;PIK3CA;COL4A2;TRAF3;COL4A1;CKS2;RARB;BIRC3;BCL2L1
TNF signaling pathway	33/110	6.18e-07	3.28e-06	0	0	2.442	34.9138	TNFAIP3;CXCL1;PIK3R1;PTGS2;CXCL5;ICAM1;CASP8;CASP10;CASP3;CCL5;AKT3;MAP3K8;DNM1L;VCAM1;MLKL;CCL20;LIF;VEGFC;MAPK14;SELE;NFKB1;TNFRSF1A;NFKBIA;CXCL10;MMP14;PIK3CA;TRAF3;IL1B;IRF1;FAS;IL18R1;CREB5;BIRC3
Human papillomavirus infection	72/330	7e-07	3.66e-06	0	0	1.776	25.1692	RB1;ITGB1;MAML2;ITGB5;ITGB4;ITGB3;TNC;PPP2R2A;LAMC2;LAMC1;COMP;TBK1;CASP8;CASP3;AKT3;ITGAV;ITGB6;ATP6V1E1;PDGFRB;IFNAR2;PRKCI;ITGA4;ITGA3;ITGA2;HLA-F;TNFRSF1A;CCNA2;PKM;COL4A2;PIK3CA;COL4A1;TRAF3;IRF1;ATP6V1B2;ITGA8;COL6A3;ITGA5;ATP6V0D1;ATP6V0D2;ATP6V0C;IRF9;CREB5;ITGA9;LAMA2;LAMA4;LAMA3;PIK3R1;PSEN1;PTGS2;THBS2;THBS1;PPP2R3C;WNT2;ATP6V0A1;TCF7L2;LAMB3;CSNK1A1;STAT1;FZD7;STAT2;MX1;FN1;EIF2AK2;LA…
Hepatitis B	43/163	7.22e-07	3.71e-06	0	0	2.14736	30.3655	RB1;CXCL8;YWHAB;PIK3R1;IFIH1;TBK1;CASP8;CASP10;CASP3;AKT3;STAT4;STAT6;E2F3;JAK2;SMAD2;TGFB2;EGR2;TGFB1;APAF1;PRKCB;TGFB3;DDX58;STAT1;STAT2;STAT3;NFATC2;MAPK14;YWHAZ;NFKB1;TGFBR1;TGFBR2;NFKBIA;CCNA2;PIK3CA;TRAF3;BIRC5;FAS;GRB2;KRAS;TLR4;MYD88;CREB5;TLR2
Fc gamma R-mediated phagocytosis	29/91	7.29e-07	3.68e-06	0	0	2.59407	36.6574	ARPC1B;ASAP1;ASAP2;PIK3R1;FCGR3A;SCIN;INPP5D;AKT3;CFL1;RAC2;PLCG2;PIP5K1A;RAC1;WASF2;LYN;SYK;PRKCB;PLA2G4A;GAB2;IGH;ARPC5;VAV1;PTPRC;FCGR2A;PIK3CA;ARPC2;ARPC3;DOCK2;FCGR2B
MAPK signaling pathway	66/295	7.93e-07	3.94e-06	0	0	1.82115	25.5826	PTPRR;RASGRF2;IL1RAP;ARRB2;FGF1;AREG;RPS6KA3;PPP3CA;FGF7;CASP3;AKT3;RAC2;MAP3K8;RAC1;PDGFRB;PDGFRA;MEF2C;IL1R1;PRKCB;CACNA2D1;HGF;PLA2G4A;DUSP6;TGFBR1;EREG;TNFRSF1A;TGFBR2;IL1A;MRAS;IL1B;KIT;MAPKAPK2;RASA2;MET;CSF1R;CACNA1C;EFNA5;STK4;RASGRP1;RASGRP3;RAP1B;RAP1A;PDGFC;MAP3K20;FLNA;CD14;PAK2;MAP4K4;TGFB2;TGFB1;ANGPT2;GADD45A;TGFB3;VEGFC;IGF1;GNG12;MAPK14;NFKB1;KITLG;TAOK3;TAOK1;FAS;GRB2;KRAS;TEK;M…
Th1 and Th2 cell differentiation	29/92	9.41e-07	4.6e-06	0	0	2.56587	35.6051	MAML2;CD3G;GATA3;CD3E;IL2RG;CD3D;PPP3CA;HLA-DMA;HLA-DMB;STAT4;STAT6;HLA-DOA;JAK2;HLA-DOB;HLA-DQA1;HLA-DPA1;IFNGR1;STAT1;IFNGR2;NFATC2;MAPK14;NFKB1;NFKBIA;CD4;MAF;IFNG;IL2RA;HLA-DPB1;HLA-DQB1
Graft-versus-host disease	17/41	2.56e-06	1.23e-05	0	0	3.37513	43.4589	CD86;CD80;HLA-F;IL1A;HLA-DMA;HLA-DMB;IFNG;IL1B;CD28;HLA-DPB1;FAS;KLRD1;HLA-DOA;HLA-DOB;HLA-DQA1;HLA-DPA1;HLA-DQB1
Fc epsilon RI signaling pathway	23/68	3.21e-06	1.52e-05	0	0	2.75324	34.8273	LYN;FCER1G;SYK;PLA2G4A;GAB2;PIK3R1;IGH;MAPK14;VAV1;PIK3CA;ALOX5;INPP5D;AKT3;ALOX5AP;RAC2;BTK;PLCG2;LCP2;FYN;KRAS;GRB2;RAC1;MS4A2
Allograft rejection	16/38	3.96e-06	1.85e-05	0	0	3.42737	42.6361	CD86;CD80;IGH;HLA-F;HLA-DMA;HLA-DMB;CD40LG;IFNG;CD28;HLA-DPB1;FAS;HLA-DOA;HLA-DOB;HLA-DQA1;HLA-DPA1;HLA-DQB1
Sphingolipid signaling pathway	33/119	4.25e-06	1.95e-05	0	0	2.25731	27.9191	ROCK1;PPP2R2A;PIK3R1;SGMS2;GNAI1;GNAI2;GNA13;SGPL1;SPTLC2;PPP2R3C;AKT3;RAC2;S1PR1;FYN;RAC1;CTSD;CERS5;ABCC1;CERS6;FCER1G;PRKCB;GAB2;MAPK14;SGPP2;NFKB1;RHOA;TNFRSF1A;PLCB4;PIK3CA;GNAQ;DEGS1;KRAS;MS4A2
Epithelial cell signaling in Helicobacter pylori infection	22/68	1.18e-05	5.34e-05	0	0	2.63353	29.8854	LYN;CXCL8;ADAM10;CXCL1;NOD1;MAPK14;NFKB1;NFKBIA;ADAM17;CASP3;CCL5;ATP6V1B2;PLCG2;RAC1;ATP6V1E1;ATP6V0D1;ATP6V0C;MET;ATP6V0D2;HBEGF;JAM3;ATP6V0A1
Axon guidance	43/181	1.34e-05	5.99e-05	0	0	1.93381	21.6961	ITGB1;CAMK2D;BMPR2;ROCK1;SEMA3C;SEMA3A;ILK;CXCR4;PIK3R1;EFNA5;MYL12A;GNAI1;MYL12B;ROBO1;GNAI2;EFNB2;PPP3CA;ABLIM3;DPYSL2;CFL1;ABL1;PLCG2;RAC2;SLIT3;FYN;PLXNC1;RAC1;SLIT2;SRGAP2;PAK2;NCK1;EPHA4;SEMA4D;TRPC1;NFATC2;SSH2;RHOA;PIK3CA;PLXNB2;KRAS;MYL9;MET;EPHA3
African trypanosomiasis	15/37	1.38e-05	6.07e-05	0	0	3.3	36.9294	VCAM1;PRKCB;LAMA4;IL18;IGH;SELE;ICAM1;PLCB4;IFNG;IL1B;GNAQ;FAS;APOL1;MYD88;IDO1
Natural killer cell mediated cytotoxicity	34/131	1.47e-05	6.37e-05	0	0	2.11267	23.5109	ITGB2;PIK3R1;ITGAL;ICAM1;PPP3CA;FCGR3A;CASP3;KLRC4-KLRK1;TNFSF10;PLCG2;RAC2;FYN;RAC1;IFNAR2;FCER1G;SYK;PRKCB;IFNGR1;IFNGR2;SH2D1A;NFATC2;IGH;VAV1;TYROBP;PIK3CA;IFNG;FAS;KLRD1;GRB2;LCP2;CD48;PTPN6;KRAS;HCST
Phospholipase D signaling pathway	37/148	1.57e-05	6.74e-05	0	0	2.035	22.5047	RALA;CXCL8;RALB;DGKA;LPAR1;ADCY3;PIK3R1;PIK3CG;CYTH3;GNA13;AKT3;PDGFC;PLCG2;PIP5K1A;FYN;CYTH1;PDGFRB;PDGFRA;FCER1G;SYK;F2R;PLA2G4A;AVPR1A;GAB2;IGH;RHOA;DNM3;KITLG;MRAS;PLCB4;PIK3CA;LPAR6;KIT;GRB2;KRAS;MS4A2;DGKH
Legionellosis	19/55	1.6e-05	6.77e-05	0	0	2.812	31.0459	CXCL8;ITGAM;CR1;APAF1;ITGB2;IL18;CXCL1;NFKB1;C3;NFKBIA;CASP8;CASP3;IL1B;CASP1;CD14;TLR5;TLR4;MYD88;TLR2
Pancreatic cancer	23/75	2.02e-05	8.4e-05	0	0	2.49627	26.9861	RB1;SMAD2;RALA;TGFB2;RALB;TGFB1;TGFB3;STAT1;GADD45A;STAT3;PIK3R1;BRCA2;TGFBR1;NFKB1;TGFBR2;PIK3CA;AKT3;RAC2;E2F3;KRAS;RAC1;ARHGEF6;BCL2L1
Colorectal cancer	25/86	2.5e-05	0.000103	0	0	2.36628	25.0765	RALA;RALB;LEF1;PIK3R1;AREG;CASP3;AKT3;RAC2;PMAIP1;RAC1;SMAD2;TCF7L2;TGFB2;TGFB1;TGFB3;GADD45A;RHOA;TGFBR1;EREG;TGFBR2;PIK3CA;BIRC5;CTNNB1;KRAS;GRB2
Type I diabetes mellitus	16/43	2.58e-05	0.000105	0	0	3.02884	31.9981	CD86;CD80;HLA-F;IL1A;HLA-DMA;HLA-DMB;IFNG;IL1B;CD28;HLA-DPB1;FAS;HLA-DOA;HLA-DOB;HLA-DQA1;HLA-DPA1;HLA-DQB1
Relaxin signaling pathway	33/130	3.18e-05	0.000127	0	0	2.06631	21.3993	ADCY3;PIK3R1;ARRB2;GNAI1;GNAI2;GNA15;GNG2;AKT3;SMAD2;TGFB1;MMP1;MMP2;VEGFC;GNG12;MAPK14;NFKB1;TGFBR1;TGFBR2;COL1A1;NFKBIA;ACTA2;COL3A1;COL1A2;MMP13;PLCB4;COL4A2;PIK3CA;COL4A1;GNB1;GNB4;GRB2;KRAS;CREB5
Antigen processing and presentation	23/77	3.23e-05	0.000128	0	0	2.43143	25.1411	CD74;NFYB;IFI30;HLA-F;CTSS;TAPBP;HLA-DMA;CD4;HLA-DMB;IFNG;CTSL;RFX5;PSME1;HLA-DPB1;KLRD1;HLA-DOA;B2M;HLA-DOB;HLA-DQA1;CTSB;HLA-DPA1;HLA-DQB1;LGMN
Asthma	13/31	3.37e-05	0.000131	0	0	3.41355	35.1528	CCL11;FCER1G;IGH;HLA-DMA;HLA-DMB;CD40LG;HLA-DPB1;HLA-DOA;MS4A2;HLA-DOB;HLA-DQA1;HLA-DPA1;HLA-DQB1
Hepatitis C	37/155	4.66e-05	0.000179	0	0	1.9431	19.3814	RB1;RNASEL;YWHAB;PPP2R2A;PIK3R1;IFIT1;TBK1;CASP8;CASP3;AKT3;E2F3;YWHAH;IFNAR2;RSAD2;APAF1;DDX58;STAT1;STAT2;MX1;STAT3;EIF2AK2;YWHAZ;NFKB1;TNFRSF1A;NFKBIA;CXCL10;OAS1;PIK3CA;IFNG;TRAF3;OAS2;CLDN18;FAS;CTNNB1;GRB2;KRAS;IRF9
Systemic lupus erythematosus	33/133	5.2e-05	0.000198	0	0	2.0197	19.9228	CD86;C1QB;C1QA;C1S;C1R;CD80;C2;C3;C4A;FCGR3A;HLA-DMA;HLA-DMB;SNRPD1;HLA-DOA;HLA-DOB;TRIM21;HLA-DQA1;HLA-DPA1;SSB;H2AFY;ACTN1;ACTN4;IGH;HIST2H2BE;FCGR2A;CD40LG;IFNG;HIST1H2BF;CD28;HLA-DPB1;HIST1H2BC;HLA-DQB1;C1QC
TGF-beta signaling pathway	25/90	5.77e-05	0.000217	0	0	2.26111	22.0682	BMPR2;ROCK1;THBS1;LTBP1;ACVR1;TGIF1;SMAD2;TGFB2;TGFB1;SMURF2;TGFB3;INHBA;RHOA;TGFBR1;DCN;BMP6;TGFBR2;RBX1;ZFYVE16;TFDP1;IFNG;BAMBI;ID2;ID3;FMOD
Acute myeloid leukemia	20/66	8.29e-05	0.000308	0	0	2.46667	23.1821	CSF1R;TCF7L2;ITGAM;BCL2A1;JUP;LEF1;STAT3;PIK3R1;DUSP6;NFKB1;RUNX1;PIK3CA;AKT3;KIT;KRAS;GRB2;PIM2;CD14;PPARD;RUNX1T1
Viral carcinogenesis	44/201	8.81e-05	0.000323	0	0	1.78189	16.6379	RB1;SP100;YWHAB;PIK3R1;HDAC9;C3;SCIN;CASP8;CASP3;CHEK1;PMAIP1;RAC1;CCR4;YWHAH;LYN;EGR2;SYK;ACTN1;STAT3;EIF2AK2;ACTN4;HLA-F;GTF2H3;YWHAZ;RHOA;HIST2H2BE;NFKB1;NFKBIA;CCNA2;PKM;PIK3CA;TRAF3;MAPKAPK2;RASA2;REL;HIST1H2BF;GRB2;KRAS;ATP6V0D1;IL6ST;ATP6V0D2;IRF9;HIST1H2BC;CREB5
Endocytosis	51/244	9.03e-05	0.000327	0	0	1.7014	15.8438	ARF3;TFRC;WIPF1;SH3KBP1;ARPC1B;CLTB;CBLB;ARRB2;RAB22A;CAPZB;CHMP1B;AP2M1;PDGFRA;PRKCI;ARAP2;HLA-F;RHOA;TGFBR1;TGFBR2;DNM3;ACAP2;ZFYVE16;RAB31;RAB7A;RAB5C;CXCR4;ASAP1;ASAP2;IL2RG;CBL;CYTH3;GRK5;PIP5K1A;EPS15;CYTH1;SNX6;SMAD2;SMURF2;CAV1;AP2B1;ARPC5;RAB11A;SPART;DAB2;ARPC2;ARPC3;NEDD4;CAPZA1;IL2RA;SMAP2;FOLR2
Ferroptosis	14/40	0.000176	0.000631	0	0	2.849	24.6278	PRNP;TFRC;GPX4;ACSL1;GSS;SLC40A1;CYBB;ACSL5;ACSL4;ACSL3;SAT1;CP;HMOX1;FTL
Transcriptional misregulation in cancer	40/186	0.000266	0.000943	0	0	1.75054	14.408	CD86;CSF1R;CXCL8;ITGAM;LDB1;HPGD;BCL2A1;JMJD1C;PLAT;MLLT3;FUT8;PLAU;CD14;RUNX1T1;MEF2C;JUP;GADD45A;IL1R2;IGFBP3;MITF;ETV1;IGF1;IGH;RUNX2;NFKB1;FLI1;DUSP6;RUNX1;ETV6;TGFBR2;MAF;ZEB1;ID2;REL;BMP2K;PPARG;ERG;MET;BCL2L1;BIRC3
JAK-STAT signaling pathway	36/162	0.000271	0.00095	0	0	1.80889	14.8547	PIK3R1;IL2RG;CSF2RA;AKT3;STAT4;STAT6;JAK2;SOCS4;IL13RA1;MCL1;SOCS5;PDGFRB;IFNAR2;PDGFRA;PIAS3;IFNGR1;STAT1;IFNGR2;IL10RA;STAT2;STAT3;LIF;OSMR;PIK3CA;IFNG;IL7;IFNE;IL2RA;IL3RA;IFNK;GRB2;PTPN6;IL6ST;IL7R;IRF9;BCL2L1
p53 signaling pathway	20/72	0.000307	0.00106344	0	0	2.26111	18.2872	RRM2;APAF1;GADD45A;IGFBP3;SERPINE1;SHISA5;IGF1;THBS1;SERPINB5;CCNB2;CASP8;SESN3;ZMAT3;CASP3;PERP;CHEK1;PMAIP1;FAS;SFN;BCL2L1
Tight junction	37/170	0.000347	0.00118728	0	0	1.77165	14.1136	ITGB1;ROCK1;PPP2R2A;CD1C;ACTB;MYL12A;CD1A;ACTG1;MYL12B;TUBA1C;TUBA1B;RAP1A;TUBA1A;MYH11;RAC1;BVES;MYH10;MPDZ;RAB8B;JAM3;ACTR3;ACTR2;PRKCI;ACTN1;MSN;ACTN4;RHOA;RUNX1;TIAM1;MYL6;CTTN;NEDD4;MYH9;CLDN18;HCLS1;EZR;MYL9
Autoimmune thyroid disease	16/53	0.000435	0.00147281	0	0	2.45736	19.0195	CD86;CD80;IGH;HLA-F;HLA-DMA;HLA-DMB;CD40LG;CD28;HLA-DPB1;CTLA4;FAS;HLA-DOA;HLA-DOB;HLA-DQA1;HLA-DPA1;HLA-DQB1
Hippo signaling pathway	35/160	0.000447	0.00149777	0	0	1.78063	13.7324	YAP1;BMPR2;YWHAB;SERPINE1;ITGB2;LEF1;PPP2R2A;FGF1;AREG;ACTB;ACTG1;RASSF2;TP53BP2;CTNNA1;WNT2;YWHAH;SMAD2;WWTR1;TCF7L2;PRKCI;TGFB2;TGFB1;TGFB3;FZD7;YWHAZ;BMP6;TGFBR1;TGFBR2;MOB1A;FRMD6;ID2;SNAI2;BIRC5;CTNNB1;FAT4
Renal cell carcinoma	19/69	0.000485	0.00160741	0	0	2.24145	17.1037	TGFB2;EGLN3;TGFB1;TGFB3;HGF;SLC2A1;PIK3R1;ETS1;HIF1A;RBX1;RAP1B;RAP1A;PIK3CA;AKT3;KRAS;GRB2;RAC1;MET;PAK2
Central carbon metabolism in cancer	18/65	0.000628	0.00205848	0	0	2.25416	16.619	PDGFRB;PDGFRA;TIGAR;IDH1;SLC2A1;PIK3R1;HIF1A;HK2;HK1;LDHA;PKM;PIK3CA;AKT3;KIT;KRAS;MET;PFKM;PFKP
Chronic myeloid leukemia	20/76	0.000662	0.00214554	0	0	2.14211	15.6815	RB1;TGFB2;TGFB1;TGFB3;GADD45A;GAB2;PIK3R1;CBL;TGFBR1;NFKB1;RUNX1;TGFBR2;NFKBIA;PIK3CA;AKT3;ABL1;E2F3;KRAS;GRB2;BCL2L1
Gap junction	22/88	0.00078	0.00250343	0	0	2.035	14.5622	PDGFRB;PDGFRA;PRKCB;TUBB;HTR2B;ITPR1;LPAR1;ADCY3;ITPR3;HTR2A;GNAI1;GNAI2;TUBA1C;GJA1;TUBA1B;TUBA1A;PLCB4;GNAQ;PDGFC;KRAS;GRB2;PRKG1
Cellular senescence	34/160	0.000922	0.00292678	0	0	1.72975	12.0897	RB1;CXCL8;SERPINE1;ITPR1;ITPR3;PIK3R1;ETS1;CCNB2;PPP3CA;RASSF5;CHEK1;AKT3;CAPN2;E2F3;SMAD2;TGFB2;TGFB1;TGFB3;GADD45A;IGFBP3;NFATC2;HLA-F;MAPK14;NFKB1;TGFBR1;TGFBR2;CCNA2;IL1A;MRAS;PIK3CA;MAPKAPK2;KRAS;CALM2;MCU
Glycolysis / Gluconeogenesis	18/68	0.00112047	0.00352147	0	0	2.15471	14.6391	GPI;TPI1;ENO1;ENO2;HK2;HK1;ALDH1A3;LDHA;PKM;ALDH2;ALDH1B1;PGK1;PGM2;ALDOC;ALDOA;GAPDH;PFKM;PFKP
Necroptosis	34/162	0.00115633	0.00359748	0	0	1.7084	11.553	PYGB;CAMK2D;TNFAIP3;PYGL;CASP8;CHMP1B;CAPN2;TNFSF10;CASP1;STAT4;STAT6;DNM1L;JAK2;IFNAR2;PARP4;MLKL;H2AFY;IFNGR1;STAT1;IFNGR2;STAT2;STAT3;CYBB;EIF2AK2;PLA2G4A;TNFRSF1A;IL1A;IFNG;IL1B;FAS;TLR4;IRF9;FTL;BIRC3
Prostate cancer	23/97	0.00130721	0.00402622	0	0	1.93011	12.8156	RB1;PDGFRB;PDGFRA;TCF7L2;IL1R2;GSTP1;LEF1;PLAT;PIK3R1;IGF1;NFKB1;NFKBIA;ZEB1;PIK3CA;PLAU;AKT3;PDGFC;CTNNB1;GRB2;E2F3;KRAS;ERG;CREB5
Phosphatidylinositol signaling system	23/99	0.00174614	0.00532486	0	0	1.89111	12.0092	MTMR2;PRKCB;DGKA;ITPR1;ITPR3;PIK3R1;MTM1;INPP4A;INPP4B;PIP4P2;PLCB4;PPIP5K1;INPP5F;IMPA1;PIK3CA;INPP5D;PLCG2;PI4KA;PIP4K2A;PIP5K1A;CALM2;PI4K2A;DGKH
Apelin signaling pathway	29/137	0.00223771	0.00675702	0	0	1.72307	10.5147	SERPINE1;ITPR1;ADCY3;PLAT;ITPR3;SLC8A1;PIK3CG;GNAI1;MYLK;SLC9A1;GNAI2;GNA13;GNG2;AKT3;MEF2A;SMAD2;MEF2C;GNG12;TGFBR1;ACTA2;MRAS;PLCB4;GNAQ;CAMK4;GNB1;APLNR;GNB4;KRAS;CALM2
Serotonergic synapse	25/113	0.00232902	0.00696443	0	0	1.80089	10.9175	ITPR1;HTR2B;ITPR3;CACNA1C;HTR2A;CYP2C19;PTGS2;CYP2C18;GNAI1;GNAI2;PTGS1;GNG2;CASP3;ALOX5;KCND2;PRKCB;TRPC1;PLA2G4A;GNG12;CYP2C9;PLCB4;GNAQ;GNB1;GNB4;KRAS
Vascular smooth muscle contraction	28/132	0.00255462	0.00756559	0	0	1.72667	10.308	CALCRL;ROCK1;NPR2;ITPR1;ADCY3;ITPR3;CACNA1C;ACTG2;MYLK;GNA13;EDNRA;CALD1;KCNMB1;MYH11;PRKG1;PRKCH;PPP1R12A;PRKCB;PLA2G2A;PLA2G4A;AVPR1A;RHOA;ACTA2;MYL6;PLCB4;GNAQ;MYL9;CALM2
Oxytocin signaling pathway	31/153	0.00329035	0.0096517	0	0	1.64928	9.42855	CAMK2D;ROCK1;NPR2;ITPR1;ADCY3;ITPR3;CACNA1C;PTGS2;ACTB;PIK3CG;GNAI1;ACTG1;MYLK;GNAI2;PPP3CA;CD38;KCNJ2;MEF2C;PPP1R12A;PRKCB;CACNA2D1;NFATC2;PLA2G4A;RHOA;MYL6;PLCB4;GNAQ;CAMK4;KRAS;MYL9;CALM2
Primary immunodeficiency	1937-11-01	0.00380509	0.0110563	0	0	2.42	13.4828	CD4;PTPRC;CD40LG;RFX5;BTK;IGH;IL2RG;CD3E;ICOS;IL7R;CD3D
Choline metabolism in cancer	22/99	0.00389532	0.0112127	0	0	1.80889	10.0357	PDGFRB;PDGFRA;SLC22A3;PCYT1A;SLC44A1;PRKCB;SLC44A2;DGKA;PLA2G4A;PIK3R1;GPCPD1;HIF1A;PIK3CA;AKT3;PDGFC;RAC2;PIP5K1A;GRB2;KRAS;RAC1;WASF2;DGKH
Hepatocellular carcinoma	33/168	0.00412879	0.0117747	0	0	1.59893	8.77776	RB1;MGST3;GSTP1;LEF1;PIK3R1;ACTB;ACTG1;AKT3;PLCG2;HMOX1;E2F3;WNT2;SMAD2;NQO1;TCF7L2;TGFB2;TGFB1;PRKCB;TGFB3;GADD45A;CSNK1A1;HGF;FZD7;TXNRD1;TGFBR1;TGFBR2;PIK3CA;CTNNB1;GRB2;KRAS;MET;BCL2L1;NFE2L2
Amino sugar and nucleotide sugar metabolism	13/48	0.00424097	0.0119837	0	0	2.20459	12.0436	GPI;UXS1;GFPT2;HEXA;NPL;HK2;HK1;CYB5R2;CYB5R4;CYB5R3;GNPDA1;GNPDA2;PGM2
Cholinergic synapse	24/112	0.00434571	0.012168	0	0	1.74429	9.48642	CAMK2D;PRKCB;ITPR1;ADCY3;ITPR3;PIK3R1;CACNA1C;GNG12;PIK3CG;GNAI1;GNAI2;PLCB4;GNG2;PIK3CA;GNAQ;CAMK4;AKT3;GNB1;GNB4;FYN;KRAS;JAK2;KCNJ2;CREB5
Parathyroid hormone synthesis, secretion and action	23/106	0.00439733	0.0122016	0	0	1.76623	9.58489	MEF2A;MEF2C;PRKCB;PDE4D;ITPR1;ADCY3;ITPR3;GATA3;ARRB2;RUNX2;RHOA;GNAI1;GNAI2;GNA13;MMP14;MAFB;MMP13;PLCB4;MMP16;GNAQ;PDE4B;CREB5;HBEGF
Fructose and mannose metabolism	1933-10-01	0.00490223	0.0134811	0	0	2.46667	13.1179	TIGAR;PFKFB3;TPI1;AKR1B10;ALDOC;ALDOA;PFKM;HK2;PFKP;HK1
Vibrio cholerae infection	13/50	0.00617553	0.0168324	0	0	2.1164	10.7665	ERO1A;SLC12A2;ADCY3;ACTB;ACTG1;SEC61A2;ATP6V1B2;PLCG2;ATP6V1E1;ATP6V0D1;ATP6V0C;ATP6V0D2;ATP6V0A1
cGMP-PKG signaling pathway	32/166	0.00625589	0.0169019	0	0	1.56916	7.96227	ROCK1;NPR2;ITPR1;ATP2A2;ADCY3;ITPR3;CACNA1C;SLC8A1;PIK3CG;GNAI1;MYLK;GNAI2;GNA13;PPP3CA;EDNRA;PLN;KCNMB1;AKT3;PRKG1;MEF2A;MEF2C;PPP1R12A;ATP2B4;NFATC2;ATP1B3;ATP2B1;RHOA;PLCB4;GNAQ;MYL9;CALM2;CREB5
ErbB signaling pathway	19/85	0.00654717	0.017535	0	0	1.81953	9.14992	CAMK2D;PRKCB;CBLB;NRG1;PIK3R1;CBL;AREG;EREG;NRG3;PIK3CA;AKT3;ABL1;PLCG2;ABL2;KRAS;GRB2;PAK2;NCK1;HBEGF
Pancreatic secretion	21/98	0.00731968	0.019435	0	0	1.74429	8.57699	SLC12A2;PRKCB;TRPC1;PLA2G2A;ITPR1;ATP2B4;ATP2A2;ADCY3;ATP1B3;ITPR3;ATP2B1;RHOA;RAB11A;SLC9A1;RAP1B;BST1;RAP1A;PLCB4;GNAQ;CD38;RAC1
Mineral absorption	13/51	0.00737608	0.0194174	0	0	2.0749	10.1868	SLC40A1;CYBRD1;ATP1B3;SLC5A1;ATP2B1;SLC8A1;HEPH;HMOX1;SLC26A9;ATP7A;STEAP1;STEAP2;FTL
Calcium signaling pathway	35/188	0.00769592	0.0200877	0	0	1.51543	7.37568	CAMK2D;PDE1A;PTAFR;ITPR1;HTR2B;ATP2A2;ADCY3;CXCR4;ITPR3;CACNA1C;HTR2A;SLC8A1;MYLK;PPP3CA;GNA14;CYSLTR1;EDNRA;GNA15;PLN;PLCG2;CD38;PDGFRB;PDGFRA;PRKCB;F2R;ATP2B4;AVPR1A;IGH;ATP2B1;GNAL;PLCB4;GNAQ;CAMK4;CALM2;MCU
Prion diseases	1935-10-01	0.0077351	0.0200203	0	0	2.32572	11.3076	C1QB;C1QA;PRNP;IL1A;CCL5;IL1B;FYN;LAMC1;NCAM2;C1QC
Gastric cancer	29/149	0.00780779	0.02004	0	0	1.5843	7.68801	RB1;ABCB1;LEF1;PIK3R1;FGF1;FGF7;AKT3;CTNNA1;E2F3;WNT2;SMAD2;TCF7L2;TGFB2;TGFB1;JUP;TGFB3;GADD45A;CSNK1A1;HGF;FZD7;TGFBR1;TGFBR2;PIK3CA;RARB;CTNNB1;GRB2;KRAS;CDH17;MET
Cell cycle	25/124	0.00825064	0.0210016	0	0	1.64113	7.87327	RB1;YWHAB;CDC14A;CCNB2;PTTG1;CHEK1;CDC27;ABL1;SFN;E2F3;BUB1;YWHAH;SMAD2;TGFB2;TGFB1;TGFB3;GADD45A;CDC7;CDC6;YWHAZ;RBX1;CCNA2;TFDP1;MCM6;MAD2L1
IL-17 signaling pathway	20/93	0.00837767	0.0211502	0	0	1.75054	8.3714	CXCL8;CCL11;MMP1;CCL20;TNFAIP3;CXCL1;PTGS2;MAPK14;CXCL5;NFKB1;NFKBIA;CXCL10;CASP8;TBK1;MMP13;IFNG;TRAF3;CASP3;IL1B;LCN2
Gastric acid secretion	17/75	0.00848534	0.0212478	0	0	1.84507	8.7999	CAMK2D;PRKCB;ITPR1;ADCY3;ATP1B3;ITPR3;ACTB;GNAI1;MYLK;SLC9A1;GNAI2;PLCB4;GNAQ;EZR;KCNK2;CALM2;KCNJ2
Inflammatory mediator regulation of TRP channels	21/100	0.00925555	0.0229896	0	0	1.7094	8.00433	CAMK2D;PRKCH;IL1R1;PRKCB;PTGER2;ITPR1;HTR2B;PLA2G4A;ADCY3;ITPR3;IL1RAP;PIK3R1;IGF1;HTR2A;MAPK14;PLCB4;PIK3CA;GNAQ;IL1B;PLCG2;CALM2
Sphingolipid metabolism	1947-12-01	0.00971714	0.023943	0	0	2.0783	9.63056	GALC;UGCG;SGPL1;CERS5;CERS6;SPTLC2;GLB1;ACER3;DEGS1;SGMS2;SGPP2;GLA
Galactose metabolism	1931-09-01	0.010108	0.0247084	0	0	2.36323	10.8577	B4GALT1;AKR1B10;GLB1;PGM2;PFKM;GLA;HK2;PFKP;HK1
cAMP signaling pathway	38/212	0.0105371	0.0255546	0	0	1.45906	6.64287	CAMK2D;ROCK1;PTGER2;ADCY3;ATP2A2;PIK3R1;CACNA1C;GLI3;GNAI1;GNAI2;SLC9A1;RAP1B;EDNRA;RAP1A;PLN;AKT3;RAC2;PDE4B;RAC1;ABCC4;GABBR1;PPP1R12A;PDE4D;F2R;ATP2B4;ATP1B3;ATP2B1;RHOA;VAV1;NFKB1;NFKBIA;TIAM1;PDE10A;PIK3CA;CAMK4;MYL9;CALM2;CREB5
VEGF signaling pathway	14/59	0.0107308	0.0258209	0	0	1.93153	8.75878	PRKCB;PLA2G4A;NFATC2;PIK3R1;PTGS2;MAPK14;PPP3CA;PIK3CA;AKT3;MAPKAPK2;RAC2;PLCG2;KRAS;RAC1
Salivary secretion	19/90	0.0121857	0.0290946	0	0	1.71845	7.57403	SLC12A2;PRKCB;ITPR1;ATP2B4;ADCY3;ATP1B3;ITPR3;ATP2B1;LYZ;SLC9A1;CST2;BST1;CST1;PLCB4;DMBT1;GNAQ;CD38;CALM2;PRKG1
Melanoma	16/72	0.0126586	0.0299911	0	0	1.80889	7.9038	RB1;PDGFRB;PDGFRA;GADD45A;HGF;MITF;PIK3R1;IGF1;FGF1;FGF7;PIK3CA;AKT3;PDGFC;E2F3;KRAS;MET
Thyroid hormone signaling pathway	23/116	0.0133347	0.0313519	0	0	1.61397	6.96811	MED1;PRKCB;STAT1;ITGB3;DIO2;SLC2A1;ATP2A2;ATP1B3;PIK3R1;MED27;HIF1A;ACTB;ACTG1;SLC9A1;PLCB4;PLN;PIK3CA;AKT3;PLCG2;CTNNB1;ITGAV;KRAS;PFKP
Fatty acid biosynthesis	2013-05-01	0.0153112	0.0357261	0	0	3.13077	13.084	ACSL1;ACSL5;ACSL4;ACSL3;ACACA
Inositol phosphate metabolism	16/74	0.016352	0.0378677	0	0	1.76	7.2396	MTMR2;TPI1;PIK3CG;MTM1;INPP4A;INPP4B;PLCB4;IMPA1;PIK3CA;INPP5F;INPP5D;PLCG2;PI4KA;PIP4K2A;PIP5K1A;PI4K2A
Glutathione metabolism	13/56	0.0163757	0.0376397	0	0	1.88964	7.77014	GPX2;GPX1;RRM2;GPX4;GSTP1;MGST3;GSS;IDH1;GPX8;PGD;HPGDS;SMS;LAP3
Wnt signaling pathway	29/158	0.0171636	0.0391585	0	0	1.49405	6.07327	CAMK2D;LEF1;PRICKLE2;PSEN1;PRICKLE1;PPP3CA;RAC2;RSPO3;RAC1;WNT2;TCF7L2;MMP7;PRKCB;CSNK1A1;SERPINF1;FZD7;NFATC2;DKK1;DKK2;RHOA;RBX1;SFRP4;SFRP2;PLCB4;TBL1XR1;BAMBI;CTNNB1;LGR5;PPARD
Neurotrophin signaling pathway	23/119	0.0178413	0.0404053	0	0	1.57328	6.3344	CAMK2D;RIPK2;IRAK3;PIK3R1;PSEN1;MAPK14;NFKB1;RHOA;RAP1B;NFKBIA;RPS6KA3;RAP1A;PIK3CA;CAMK4;AKT3;ARHGDIB;MAPKAPK2;ABL1;PLCG2;GRB2;KRAS;RAC1;CALM2
ABC transporters	1945-11-01	0.0180142	0.040499	0	0	1.98978	7.99214	ABCA1;ABCC3;ABCC4;ABCD2;ABCC1;ABCB1;ABCB4;ABCC5;ABCC9;ABCA12;ABCG2
Glycosphingolipid biosynthesis	1945-11-01	0.0180142	0.0402055	0	0	1.98978	7.99214	B4GALT1;GLB1;B3GALT2;B3GNT5;HEXA;ST3GAL5;NAGA;ST3GAL6;ST6GALNAC3;GLA;ST6GALNAC5
Glioma	16/75	0.0184853	0.0409602	0	0	1.73654	6.93013	RB1;PDGFRB;PDGFRA;CAMK2D;PRKCB;GADD45A;PIK3R1;IGF1;PIK3CA;CAMK4;AKT3;PLCG2;E2F3;KRAS;GRB2;CALM2
Arachidonic acid metabolism	14/63	0.0189304	0.041647	0	0	1.80889	7.17584	GPX2;GPX1;PTGIS;PLA2G2A;GPX8;PLA2G4A;CYP2C19;PTGS2;PTGS1;CYP2C9;HPGDS;CYP2U1;ALOX5;TBXAS1
Cytosolic DNA-sensing pathway	14/63	0.0189304	0.0413516	0	0	1.80889	7.17584	DDX58;IL18;CGAS;ADAR;TMEM173;NFKB1;NFKBIA;CXCL10;TBK1;AIM2;IL1B;CCL5;CCL4;CASP1
RIG-I-like receptor signaling pathway	15/70	0.021267	0.0461283	0	0	1.74429	6.71655	CXCL8;DDX58;TMEM173;MAPK14;TANK;NFKB1;IFIH1;NFKBIA;CXCL10;CASP8;TBK1;CASP10;TRAF3;IFNE;IFNK
Pentose phosphate pathway	1930-08-01	0.0249657	0.0537723	0	0	2.17067	8.01032	GPI;RPE;PGM2;ALDOC;PGD;ALDOA;PFKM;PFKP
Non-small cell lung cancer	14/66	0.0276774	0.0591988	0	0	1.72667	6.1938	RB1;PRKCB;GADD45A;STAT3;PIK3R1;STK4;PIK3CA;RASSF5;AKT3;PLCG2;RARB;E2F3;KRAS;GRB2
Long-term depression	13/60	0.0282109	0.0599238	0	0	1.76367	6.29285	LYN;PRKCB;ITPR1;PLA2G4A;ITPR3;IGF1;GNAI1;GNAI2;GNA13;PLCB4;GNAQ;KRAS;PRKG1
Endocrine and other factor-regulated calcium reabsorption	1948-11-01	0.0284918	0.060106	0	0	1.86542	6.63742	DNM3;PLCB4;PRKCB;GNAQ;CLTB;ATP1B3;AP2B1;ATP2B1;SLC8A1;AP2M1;RAB11A
Long-term potentiation	14/67	0.0311658	0.0652999	0	0	1.7009	5.89945	CAMK2D;PRKCB;ITPR1;ITPR3;CACNA1C;RAP1B;PPP3CA;RPS6KA3;PLCB4;RAP1A;CAMK4;GNAQ;KRAS;CALM2
FoxO signaling pathway	24/132	0.0311726	0.0648728	0	0	1.48	5.13296	PLK4;SMAD2;TGFB2;TGFB1;HOMER1;TGFB3;GADD45A;STAT3;PIK3R1;IGF1;STK4;FBXO32;MAPK14;SOD2;TGFBR1;TGFBR2;CCNB2;PIK3CA;AKT3;TNFSF10;S1PR1;GRB2;KRAS;IL7R
Renin secretion	14/69	0.0390836	0.0807903	0	0	1.6516	5.35456	PTGER2;PDE1A;ITPR1;ITPR3;CACNA1C;GNAI1;GNAI2;PPP3CA;EDNRA;PLCB4;GNAQ;CALM2;KCNJ2;CTSB
Biosynthesis of unsaturated fatty acids	2027-07-01	0.0404177	0.0829911	0	0	2.11037	6.7711	FADS2;ELOVL1;ELOVL4;ELOVL5;SCD;ELOVL6;HACD4
Protein digestion and absorption	17/90	0.0458426	0.0935067	0	0	1.53756	4.73958	SLC36A1;MME;COL11A1;COL12A1;ATP1B3;PRCP;SLC8A1;DPP4;COL1A1;COL3A1;SLC7A7;COL1A2;COL4A2;COL4A1;COL5A2;COL10A1;COL6A3

## Sheet: E-GEOD-62452
Term	Overlap	P-value	Adjusted P-value	Old P-value	Old Adjusted P-value	Odds Ratio	Combined Score	Genes
ECM-receptor interaction	1982-05-01	8.41e-09	2.59e-06	0	0	67.7507	1259.74	LAMB3;ITGB4;ITGA3;ITGA2;LAMC2
Focal adhesion	5/199	7.15e-07	0.00011	0	0	27.9174	395.052	LAMB3;ITGB4;ITGA3;ITGA2;LAMC2
Small cell lung cancer	1993-04-01	1.28e-06	0.000131	0	0	47.7897	648.622	LAMB3;ITGA3;ITGA2;LAMC2
Human papillomavirus infection	5/330	8.52e-06	0.000656	0	0	16.835	196.517	LAMB3;ITGB4;ITGA3;ITGA2;LAMC2
PI3K-Akt signaling pathway	5/354	1.2e-05	0.000737	0	0	15.6937	177.858	LAMB3;ITGB4;ITGA3;ITGA2;LAMC2
Arrhythmogenic right ventricular cardiomyopathy (ARVC)	1972-03-01	3.51e-05	0.00180247	0	0	46.2963	474.858	ITGB4;ITGA3;ITGA2
Hypertrophic cardiomyopathy (HCM)	1985-03-01	5.77e-05	0.00253999	0	0	39.2157	382.737	ITGB4;ITGA3;ITGA2
Dilated cardiomyopathy (DCM)	1991-03-01	7.08e-05	0.00272441	0	0	36.63	350.043	ITGB4;ITGA3;ITGA2
Regulation of actin cytoskeleton	3/214	0.000875	0.0299581	0	0	15.5763	109.67	ITGB4;ITGA3;ITGA2
Pathways in cancer	4/530	0.00110999	0.0341878	0	0	8.38574	57.0516	LAMB3;ITGA3;ITGA2;LAMC2
Amoebiasis	1996-02-01	0.00331811	0.092907	0	0	23.1481	132.138	LAMB3;LAMC2
Hematopoietic cell lineage	1997-02-01	0.00338616	0.0869114	0	0	22.9095	130.311	ITGA3;ITGA2
Toxoplasmosis	2/113	0.00456316	0.108112	0	0	19.6657	105.993	LAMB3;LAMC2

## Sheet: GSE119794
Term	Overlap	P-value	Adjusted P-value	Old P-value	Old Adjusted P-value	Odds Ratio	Combined Score	Genes
Glycolysis / Gluconeogenesis	1968-03-01	0.00154134	0.474734	0	0	13.1694	85.2735	PKM;ALDH3B1;FBP1
Tight junction	3/170	0.0194327	1	0	0	5.26778	20.7593	SRC;CGN;TJP3
Focal adhesion	3/199	0.029196	1	0	0	4.50011	15.9022	LAMB3;ITGB4;SRC
ECM-receptor interaction	1982-02-01	0.0309164	1	0	0	7.28067	25.311	LAMB3;ITGB4
Glucagon signaling pathway	2/103	0.0467708	1	0	0	5.79626	17.751	PKM;FBP1

## Sheet: E-MTAB-3494
Term	Overlap	P-value	Adjusted P-value	Old P-value	Old Adjusted P-value	Odds Ratio	Combined Score	Genes
Focal adhesion	75/199	7.26e-26	2.24e-23	0	0	3.79732	219.805	ITGB1;GSK3B;ITGB5;ITGB4;TNC;LAMC2;LAMC1;ELK1;ACTB;MYLK;ACTG1;COMP;CCND3;AKT3;CAPN2;ITGAV;RAC1;ITGB6;PDGFRB;PDGFRA;ITGA4;ITGA3;ACTN1;ITGA2;ITGA1;ACTN4;RHOA;VAV1;COL4A2;COL4A1;COL6A2;COL6A1;COL4A5;COL6A3;ITGA5;TLN1;MYL9;MET;VCL;BIRC3;LAMA5;ROCK1;SHC1;SRC;LAMA4;LAMA3;THBS2;THBS1;MYL12A;MYL12B;CDC42;PAK1;RAP1A;PDGFC;SPP1;FLNA;FLNB;FYN;PAK2;VASP;LAMB3;CAV2;BAD;LAMB2;FN1;LAMB1;COL1A1;DIAPH1;COL1A2;PARV…
Pathways in cancer	129/530	1.46e-22	2.25e-20	0	0	2.45235	123.294	SPI1;ELK1;ETS1;FGF7;EDNRA;CCND3;RASSF5;AKT3;PIM1;IFNAR2;PDGFRB;IL15RA;PDGFRA;IL4R;DAPK3;F2R;WNT5A;MITF;RUNX1;BCR;COL4A2;COL4A1;COL4A5;TP53;CSF1R;NOTCH3;MAX;MGST3;CSF2RB;STK4;HIF1A;TPR;ABL1;HMOX1;DVL3;PLCG1;FADD;RALGDS;WNT2;FZD1;STAT5A;ZBTB17;FZD2;JAG1;TGFB1;JUP;TGFB3;FN1;GNG12;NFKB1;NFKB2;LPAR5;LPAR6;GNB2;GNB1;GNB4;GRB2;IL7R;CALM2;BCL2L1;NFE2L2;ITGB1;GSK3B;CDKN1A;SLC2A1;LAMC2;LAMC1;GLI3;GLI2;CASP…
Phagosome	60/152	3.66e-22	3.76e-20	0	0	3.9772	196.311	ITGB1;ITGAM;ITGB5;NCF2;NCF4;ITGB2;ACTB;CTSS;ACTG1;COMP;MRC2;TUBA1C;FCGR3A;TUBA1A;CTSL;MRC1;OLR1;ITGAV;RAC1;ATP6V1E1;HLA-DPA1;ATP6V0B;TUBB;ITGA2;HLA-B;HLA-C;CYBB;CYBA;HLA-A;HLA-F;TUBA4A;HLA-E;HGS;ATP6V1B2;ITGA5;RAB7B;TLR4;VAMP3;HLA-DQB1;RAB7A;ATP6V1A;COLEC12;C1R;THBS2;CORO1A;THBS1;C3;HLA-DMA;CLEC7A;CD14;ATP6V1D;HLA-DQA1;MSR1;DYNC1H1;FCGR2A;CD209;HLA-DPB1;HLA-DRA;CALR;HLA-DRB1
Regulation of actin cytoskeleton	71/214	7.91e-21	6.09e-19	0	0	3.34283	154.725	ITGB1;ITGAM;ITGB5;ITGB4;ARPC1B;ITGB2;ACTB;MYLK;ACTG1;FGF7;TMSB4X;CFL2;CFL1;ITGAX;PIP4K2A;ITGAV;RAC1;ITGB6;PDGFRB;PDGFRA;ITGA4;ITGA3;ACTN1;ITGA2;F2R;ITGA1;ACTN4;RHOA;VAV1;TIAM1;MYH9;ARHGEF1;ITGA5;PFN1;EZR;ARHGEF7;MYL9;VCL;ROCK1;SRC;WAS;CXCR4;IQGAP1;IQGAP3;MYL12A;MYL12B;SLC9A1;CDC42;GNA13;PAK1;RRAS;PDGFC;GNA12;MYH14;NCKAP1L;PAK2;MYH10;GSN;LIMK1;FN1;MSN;ARPC4;ARPC5;GNG12;BAIAP2;SSH1;DIAPH1;LPAR5;ARP…
ECM-receptor interaction	39/82	2.8e-18	1.72e-16	0	0	4.79204	193.68	ITGB1;LAMA5;ITGB5;SDC4;ITGB4;LAMA4;LAMA3;TNC;LAMC2;LAMC1;THBS2;THBS1;COMP;SPP1;ITGAV;ITGB6;ITGA4;LAMB3;ITGA3;LAMB2;ITGA2;ITGA1;FN1;LAMB1;HSPG2;COL1A1;COL1A2;COL4A2;COL4A1;COL6A2;COL6A1;ITGA11;COL4A5;COL6A3;SDC1;ITGA5;CD47;AGRN;CD44
Proteoglycans in cancer	60/201	2.17e-15	1.11e-13	0	0	3.00763	101.555	ITGB1;CDKN1A;ITGB5;ELK1;ACTB;ACTG1;CTSL;PLAU;AKT3;TIMP3;ITGAV;RAC1;MMP2;ITGA2;WNT5A;PLAUR;HSPG2;RHOA;DCN;TIAM1;CTTN;HCLS1;ARHGEF1;ITGA5;EZR;TP53;TLR4;MET;CD44;DDX5;SDC4;ROCK1;SRC;TWIST1;ITPR3;IQGAP1;CBL;HIF1A;THBS1;SLC9A1;CDC42;PAK1;RRAS;GPC1;FLNA;FLNB;PLCG1;WNT2;FZD1;FZD2;TGFB1;CAV2;LUM;FN1;WNT7A;MSN;SDC1;CTNNB1;GRB2;HPSE
Tuberculosis	54/179	3.34e-14	1.47e-12	0	0	3.03956	94.3219	CIITA;ITGAM;ITGB2;LSP1;CTSS;MRC2;PPP3CA;FCGR3A;CASP8;CASP10;AKT3;MRC1;ITGAX;CTSD;HLA-DPA1;ATP6V0B;CR1;RIPK2;IFNGR1;SPHK1;IFNGR2;IL18;RHOA;TNFRSF1A;TLR4;HLA-DQB1;RAB7A;CEBPB;SRC;BCL10;CORO1A;C3;HLA-DMA;IRAK2;CLEC7A;CD14;FADD;HLA-DQA1;PLK3;CD74;TGFB1;TGFB3;VDR;BAD;IL10RA;NFKB1;FCGR2A;CD209;HLA-DPB1;HLA-DRA;BAX;CALM2;MYD88;HLA-DRB1
Leukocyte transendothelial migration	39/112	7.9e-13	3.04e-11	0	0	3.50846	97.771	ITGB1;ITGAM;ROCK1;NCF2;NCF4;ITGB2;CXCR4;THY1;ACTB;MYL12A;ACTG1;ICAM1;MYL12B;GNAI2;CDC42;RAP1A;RASSF5;CTNNA1;PLCG1;RAC1;JAM3;VASP;ITGA4;ACTN1;MMP2;CYBB;MSN;CYBA;ACTN4;RHOA;VAV1;CLDN7;PECAM1;CTNNB1;EZR;MYL9;VCL;BCAR1;SIPA1
PI3K-Akt signaling pathway	80/354	1.29e-12	4.43e-11	0	0	2.27696	62.3264	ITGB1;GSK3B;CDKN1A;ITGB5;IRS1;YWHAB;ITGB4;TNC;LAMC2;LAMC1;COMP;GYS1;CCND3;FGF7;PPP2R1A;AKT3;ITGAV;RAC1;ITGB6;JAK3;YWHAG;YWHAH;PDGFRB;IFNAR2;PDGFRA;HSP90AA1;IL4R;ITGA4;ITGA3;ITGA2;F2R;ITGA1;OSMR;YWHAZ;EREG;COL4A2;COL4A1;CDC37;COL6A2;COL6A1;IL3RA;COL4A5;COL6A3;ITGA5;TP53;TLR4;MET;EPHA2;CSF1R;LAMA5;LAMA4;LAMA3;EFNA5;IL2RG;THBS2;THBS1;GNG5;PDGFC;SPP1;MCL1;LAMB3;BAD;LAMB2;FN1;LAMB1;GNG12;NFKB1;COL1A1;…
Human papillomavirus infection	75/330	4.87e-12	1.5e-10	0	0	2.2899	59.6451	ITGB1;GSK3B;CDKN1A;MAML2;ITGB5;ITGB4;TNC;LAMC2;LAMC1;COMP;CCND3;TBK1;CASP8;PPP2R1A;AKT3;ITGAV;ITGB6;ATP6V1E1;PDGFRB;IFNAR2;PRKCI;ATP6V0B;ITGA4;ITGA3;ITGA2;WNT5A;ITGA1;HLA-B;HLA-C;HLA-A;AXIN2;HLA-F;HLA-E;TNFRSF1A;PKM;COL4A2;COL4A1;TRAF3;COL6A2;COL6A1;ATP6V1B2;COL4A5;COL6A3;ITGA5;TP53;ATP6V1A;NOTCH3;LAMA5;LAMA4;LAMA3;THBS2;THBS1;CDC42;SPP1;DVL3;FADD;ATP6V1D;WNT2;FZD1;FZD2;JAG1;LAMB3;BAD;LAMB2;STAT2…
Pathogenic Escherichia coli infection	25/55	1.15e-11	3.21e-10	0	0	4.5798	115.374	ITGB1;ROCK1;ARPC1B;WAS;ACTB;ACTG1;CDC42;TUBA1C;TUBA1A;ABL1;FYN;CD14;TUBB;ARPC4;ARPC5;YWHAZ;RHOA;TUBA4A;CTTN;ARPC2;HCLS1;CTNNB1;ARHGEF2;EZR;TLR4
Osteoclast differentiation	40/127	1.54e-11	3.95e-10	0	0	3.17341	79.008	CSF1R;SPI1;NCF2;NCF4;FHL2;TNFRSF11B;TREM2;RELB;SOCS3;PPP3CA;FCGR3A;CTSK;AKT3;ACP5;FYN;RAC1;JUNB;IFNAR2;TGFB1;IL1R1;IFNGR1;IFNGR2;STAT2;MITF;CYBA;TRAF2;LILRB4;NFKB1;TGFBR1;NFKB2;FOSL2;TNFRSF1A;TYROBP;FCGR2A;LCK;CAMK4;GRB2;LCP2;PPARG;SQSTM1
Human T-cell leukemia virus 1 infection	55/219	6.36e-11	1.51e-09	0	0	2.53039	59.411	CDKN1A;SPI1;CRTC3;ITGB2;SLC2A1;ELK1;ETS1;ETS2;ICAM1;PPP3CA;CCND3;ZFP36;XPO1;AKT3;TSPO;B2M;JAK3;HLA-DPA1;IL15RA;IL1R1;IL15;IL1R2;HLA-B;HLA-C;HLA-A;HLA-F;TGFBR1;HLA-E;TNFRSF1A;LCK;TLN1;TP53;HLA-DQB1;ADCY3;IL2RG;ADCY7;RELB;HLA-DMA;E2F3;HLA-DQA1;STAT5A;TGFB1;TGFB3;NFKB1;NFATC4;NFKB2;CD4;IL2RA;HLA-DPB1;HLA-DRA;BAX;CALR;LTBR;HLA-DRB1;BCL2L1
Amoebiasis	33/96	6.68e-11	1.47e-09	0	0	3.46348	81.1458	LAMA5;ITGAM;LAMA4;ITGB2;LAMA3;HSPB1;LAMC2;CXCL1;LAMC1;CD14;TGFB1;LAMB3;IL1R1;TGFB3;LAMB2;IL1R2;ACTN1;FN1;SERPINB9;LAMB1;ACTN4;NFKB1;COL1A1;PLCB3;COL3A1;COL1A2;COL4A2;COL4A1;COL4A5;RAB7B;TLR4;VCL;RAB7A
Leishmaniasis	28/74	1.4e-10	2.88e-09	0	0	3.81238	86.4928	ITGB1;ITGAM;NCF2;ITGB2;NCF4;ELK1;C3;FCGR3A;HLA-DMA;HLA-DQA1;HLA-DPA1;MARCKSL1;CR1;TGFB1;ITGA4;IFNGR1;TGFB3;IFNGR2;CYBB;CYBA;NFKB1;FCGR2A;HLA-DPB1;HLA-DRA;TLR4;MYD88;HLA-DRB1;HLA-DQB1
Endocytosis	58/244	2.01e-10	3.86e-09	0	0	2.39501	53.4794	ARF3;WIPF1;SH3KBP1;ARPC1B;CLTB;CBLC;CBLB;ARRB2;CAPZB;CHMP1B;KIF5B;AP2M1;SH3GL1;PDGFRA;PRKCI;HLA-B;ARAP2;HLA-C;HLA-A;VPS37B;ARAP1;HLA-F;RHOA;TGFBR1;HLA-E;DNM2;ACAP3;RAB31;HGS;CHMP4B;RAB7A;ARF6;SRC;WAS;CXCR4;ASAP1;ASAP2;IL2RG;CBL;CDC42;CYTH3;CYTH4;GRK6;LDLR;CYTH1;SMURF1;CAV2;ARPC4;AP2B1;ARPC5;RAB11A;PML;EHD1;EHD2;ARPC2;NEDD4;CAPZA1;IL2RA
Salmonella infection	30/86	3.23e-10	5.85e-09	0	0	3.51473	76.8107	ROCK1;ARPC1B;WAS;CXCL1;ACTB;ACTG1;PYCARD;CDC42;KLC2;MYH14;FLNA;FLNB;RAC1;CD14;MYH10;DYNC1H1;IFNGR1;IFNGR2;RHOG;IL18;ARPC4;ARPC5;NFKB1;ARPC2;MYH9;PFN1;RAB7B;TLR4;MYD88;RAB7A
Axon guidance	47/181	4.65e-10	7.95e-09	0	0	2.61631	56.2242	ITGB1;GSK3B;SEMA7A;BMPR2;ROCK1;SEMA3C;SRC;CXCR4;SEMA3F;EFNA5;MYL12A;MYL12B;ROBO1;GNAI2;EFNB2;CDC42;PPP3CA;PAK1;RRAS;ABLIM3;DPYSL2;CFL2;CFL1;ABL1;FYN;PLXNC1;PLCG1;RAC1;SRGAP2;PAK2;SEMA6B;EPHA4;SEMA4A;UNC5B;SEMA4B;WNT5A;SEMA4C;LIMK1;RHOA;SSH1;NFATC4;EFNA1;PLXNB2;EPHA1;MYL9;MET;EPHA2
Viral myocarditis	24/59	5.02e-10	8.14e-09	0	0	4.09854	87.7574	CD86;ITGB2;HLA-B;HLA-C;HLA-A;HLA-F;ACTB;ACTG1;ICAM1;HLA-E;HLA-DMA;CASP8;SGCD;ABL1;HLA-DPB1;HLA-DRA;FYN;RAC1;HLA-DQA1;CD55;EIF4G2;HLA-DRB1;HLA-DPA1;HLA-DQB1
Bacterial invasion of epithelial cells	27/74	7.76e-10	1.2e-08	0	0	3.67622	77.1144	ITGB1;SHC1;SRC;ARPC1B;CLTB;WAS;CBL;ACTB;ACTG1;CDC42;CTNNA1;RAC1;CAV2;RHOG;FN1;ARPC4;ARPC5;RHOA;DNM2;CTTN;ARPC2;HCLS1;CTNNB1;ITGA5;MET;VCL;BCAR1
Shigellosis	25/65	9.03e-10	1.32e-08	0	0	3.87522	80.7036	ITGB1;ROCK1;SRC;ARPC1B;UBE2D2;WAS;NOD1;ACTB;ACTG1;CDC42;ABL1;RAC1;RIPK2;RHOG;ARPC4;ARPC5;NFKB1;DIAPH1;CTTN;ARPC2;HCLS1;ITGA5;PFN1;CD44;VCL
Fc gamma R-mediated phagocytosis	30/91	1.54e-09	2.15e-08	0	0	3.32162	67.4046	ARPC1B;WAS;ASAP1;ASAP2;CDC42;FCGR3A;PAK1;CFL2;INPP5D;AKT3;CFL1;RAC1;PLCG1;LYN;VASP;MARCKSL1;GSN;SPHK1;LIMK1;ARPC4;ARPC5;VAV1;DNM2;HCK;PTPRC;FCGR2A;ARPC2;DOCK2;PLPP2;ARF6
Human cytomegalovirus infection	53/225	1.69e-09	2.27e-08	0	0	2.37336	47.9333	GSK3B;CDKN1A;ELK1;PPP3CA;TBK1;CASP8;AKT3;ITGAV;RAC1;B2M;PDIA3;PDGFRA;IL1R1;HLA-B;HLA-C;TRAF2;HLA-A;HLA-F;TMEM173;RHOA;HLA-E;TNFRSF1A;TAPBP;PLCB3;ARHGEF1;TP53;ROCK1;SRC;PTGER2;ADCY3;CXCR4;ITPR3;ADCY7;GNAI2;GNA13;GNG5;GNA12;E2F3;FADD;CCR1;IL10RA;GNG12;NFKB1;NFATC4;GNB2;GNB1;GNB4;CTNNB1;BAX;GRB2;CALR;CALM2;BCAR1
Fluid shear stress and atherosclerosis	38/139	4.51e-09	5.79e-08	0	0	2.75447	52.9327	BMPR2;SDC4;NCF2;SRC;MGST3;GSTP1;PLAT;ACTB;ACTG1;ICAM1;CTSL;GPC1;AKT3;HMOX1;ITGAV;RAC1;ACVR1;MEF2A;NQO1;MEF2C;HSP90AA1;IL1R1;CAV2;GSTO1;IL1R2;MMP2;CYBA;NFKB1;RHOA;TNFRSF1A;PECAM1;SDC1;CTNNB1;ARHGEF2;SQSTM1;TP53;CALM2;NFE2L2
Toxoplasmosis	33/113	7.71e-09	9.5e-08	0	0	2.94242	54.9658	ITGB1;LAMA5;CIITA;LAMA4;LAMA3;LAMC2;LAMC1;GNAI2;HLA-DMA;CASP8;AKT3;LDLR;HLA-DQA1;HLA-DPA1;TGFB1;LAMB3;TGFB3;IFNGR1;BAD;LAMB2;IFNGR2;IL10RA;LAMB1;NFKB1;TNFRSF1A;HLA-DPB1;HLA-DRA;TLR4;MYD88;HLA-DRB1;BCL2L1;BIRC3;HLA-DQB1
Antigen processing and presentation	26/77	1.06e-08	1.26e-07	0	0	3.40214	62.4703	CIITA;CTSS;HLA-DMA;CTSL;B2M;HLA-DQA1;CTSB;HLA-DPA1;PDIA3;CD74;HSP90AA1;HLA-B;HLA-C;HLA-A;HLA-F;TAPBP;HLA-E;CD4;PSME1;HLA-DPB1;PSME2;HLA-DRA;CALR;HLA-DRB1;HLA-DQB1;LGMN
Arrhythmogenic right ventricular cardiomyopathy (ARVC)	25/72	1.06e-08	1.21e-07	0	0	3.49846	64.2363	ITGB1;ITGB5;ITGB4;LEF1;CACNA1C;ACTB;ACTG1;GJA1;SGCD;CDH2;LMNA;CTNNA1;ITGAV;ITGB6;ITGA4;JUP;ITGA3;CACNA2D1;ITGA2;ITGA1;CACNB1;CACNB3;ITGA11;CTNNB1;ITGA5
Kaposi sarcoma-associated herpesvirus infection	45/186	1.18e-08	1.3e-07	0	0	2.43764	44.5031	CD86;GSK3B;CDKN1A;SRC;ITPR3;CXCL1;HIF1A;ICAM1;C3;PREX1;PPP3CA;ZFP36;TBK1;CASP8;GNG5;AKT3;E2F3;PLCG1;FADD;RAC1;IFNAR2;LYN;CCR1;IFNGR1;STAT2;HLA-B;HLA-C;TRAF2;HLA-A;HLA-F;GNG12;NFKB1;HLA-E;NFATC4;TNFRSF1A;HCK;TRAF3;GNB2;MAPKAPK2;GNB1;GNB4;BAX;CTNNB1;TP53;CALM2
Epstein-Barr virus infection	47/201	1.78e-08	1.89e-07	0	0	2.35598	42.0415	CDKN1A;PSMD13;TNFAIP3;ICAM1;RELB;HLA-DMA;CCND3;TBK1;CASP8;AKT3;PSMD1;E2F3;FADD;RAC1;CD58;B2M;JAK3;HLA-DQA1;HLA-DPA1;LYN;PDIA3;IFNAR2;ENTPD1;STAT2;HLA-B;HLA-C;TRAF2;HLA-A;HLA-F;NFKB1;HLA-E;NFKB2;TAPBP;NCOR2;PSMC3;TRAF3;NEDD4;HLA-DPB1;HLA-DRA;BAX;CALR;VIM;TP53;HLA-DRB1;CD44;MYD88;HLA-DQB1
Platelet activation	34/124	2.66e-08	2.73e-07	0	0	2.76266	48.1872	ITGB1;ROCK1;SRC;SNAP23;ADCY3;ITPR3;ADCY7;ACTB;MYL12A;ACTG1;MYLK;MYL12B;GNAI2;PTGS1;GNA13;RAP1A;AKT3;FYN;VASP;LYN;PRKCI;ITGA2;F2R;RHOA;COL1A1;PLCB3;COL3A1;COL1A2;FCGR2A;TBXAS1;LCP2;ARHGEF1;TLN1;FERMT3
Apoptosis	37/143	3.54e-08	3.52e-07	0	0	2.60696	44.7255	BCL2A1;CTSZ;CSF2RB;ITPR3;ACTB;CTSS;ACTG1;TUBA1C;CASP8;TUBA1A;CASP10;CTSL;CTSK;AKT3;LMNA;CAPN2;CASP2;CAPN1;FADD;CTSD;SPTAN1;CTSC;MCL1;CTSB;PARP4;BAD;TNFRSF10B;TNFRSF10A;TRAF2;TUBA4A;NFKB1;TNFRSF1A;IL3RA;BAX;TP53;BCL2L1;BIRC3
Small cell lung cancer	28/93	5.01e-08	4.82e-07	0	0	3.0335	50.9912	ITGB1;LAMA5;CDKN1A;MAX;LAMA4;LAMA3;LAMC2;LAMC1;AKT3;ITGAV;E2F3;ZBTB17;LAMB3;ITGA3;LAMB2;ITGA2;FN1;TRAF2;LAMB1;NFKB1;COL4A2;TRAF3;COL4A1;COL4A5;BAX;TP53;BIRC3;BCL2L1
Tight junction	41/170	5.69e-08	5.31e-07	0	0	2.42999	40.5359	ITGB1;ROCK1;SRC;WAS;ACTB;MYL12A;ACTG1;MYL12B;CDC42;TUBA1C;RAP1A;TUBA1A;PPP2R1A;MICALL2;MYH14;SYMPK;MYH11;RAC1;MYH10;RAB8B;JAM3;VASP;ACTR3;ACTR2;PRKCI;ACTN1;MSN;ACTN4;TUBA4A;RHOA;RUNX1;TIAM1;MYL6;CTTN;NEDD4;CLDN7;MYH9;HCLS1;ARHGEF2;EZR;MYL9
Complement and coagulation cascades	25/79	8.72e-08	7.9e-07	0	0	3.18847	51.8272	ITGAM;CFH;C1S;C1R;PROS1;SERPINE1;ITGB2;CFI;C5AR1;F13A1;PLAT;TFPI;C3;PLAU;C3AR1;ITGAX;CD59;VSIG4;A2M;CD55;CR1;F2R;PLAUR;F3;PROCR
Rap1 signaling pathway	46/206	1.1e-07	9.68e-07	0	0	2.24988	36.0497	ITGB1;CSF1R;DOCK4;RALA;ITGAM;RALB;SRC;ITGB2;ADCY3;EFNA5;ADCY7;THBS1;ACTB;GNAI2;ACTG1;CDC42;FGF7;SIPA1L1;RAP1A;RRAS;RASSF5;AKT3;PDGFC;PLCG1;RAC1;RALGDS;VASP;PDGFRB;PDGFRA;PRKCI;F2R;RHOA;EFNA1;TIAM1;PLCB3;LPAR5;PRKD3;CTNNB1;LCP2;TLN1;PFN1;CALM2;MET;SIPA1;BCAR1;EPHA2
Hematopoietic cell lineage	28/97	1.35e-07	1.16e-06	0	0	2.90841	45.9981	CSF1R;ITGAM;HLA-DMA;CD59;CD14;HLA-DQA1;CD55;HLA-DPA1;IL4R;CR1;ITGA4;MME;IL1R1;ITGA3;IL1R2;ITGA2;ITGA1;CD4;IL2RA;IL3RA;HLA-DPB1;HLA-DRA;CD9;ITGA5;IL7R;HLA-DRB1;CD44;HLA-DQB1
Cell adhesion molecules (CAMs)	35/145	5.08e-07	4.23e-06	0	0	2.43203	35.2457	CD86;ITGB1;ITGAM;SDC4;SDC3;ITGB2;PVR;ICAM1;HLA-DMA;CDH3;CDH2;CTLA4;ITGAV;CD58;HLA-DQA1;MPZL1;CD276;HLA-DPA1;JAM3;ITGA4;HLA-B;HLA-C;HLA-A;HLA-F;HLA-E;VCAN;CD4;PTPRC;CLDN7;PECAM1;HLA-DPB1;SDC1;HLA-DRA;HLA-DRB1;HLA-DQB1
Viral carcinogenesis	43/201	9.71e-07	7.87e-06	0	0	2.15547	29.8425	CDKN1A;SP100;YWHAB;SRC;GTF2B;HDAC8;HDAC9;HDAC7;C3;CDC42;CCND3;HIST2H4B;CASP8;RAC1;JAK3;YWHAG;YWHAH;STAT5A;LYN;GSN;BAD;ACTN1;HLA-B;HLA-C;TRAF2;ACTN4;HLA-A;HLA-F;YWHAZ;RHOA;HIST2H2BE;NFKB1;HLA-E;NFKB2;PKM;TRAF3;MAPKAPK2;RASA2;REL;BAX;GRB2;LTBR;TP53
AGE-RAGE signaling pathway in diabetic complications	27/100	9.77e-07	7.72e-06	0	0	2.7204	37.647	SERPINE1;ICAM1;CDC42;AKT3;PIM1;PLCG1;RAC1;STAT5A;TGFB1;TGFB3;MMP2;FN1;CYBB;F3;NFKB1;TGFBR1;COL1A1;DIAPH1;PLCB3;COL3A1;COL1A2;COL4A2;COL4A1;COL4A5;NOX4;BAX;PLCD3
Th17 cell differentiation	28/107	1.23e-06	9.49e-06	0	0	2.6366	35.8747	AHR;IL1RAP;IL2RG;HIF1A;PPP3CA;HLA-DMA;STAT6;PLCG1;JAK3;HLA-DQA1;HLA-DPA1;STAT5A;HSP90AA1;IL4R;TGFB1;IL1R1;IFNGR1;IFNGR2;NFKB1;TGFBR1;RUNX1;CD4;LCK;IL2RA;HLA-DPB1;HLA-DRA;HLA-DRB1;HLA-DQB1
Staphylococcus aureus infection	21/68	1.45e-06	1.09e-05	0	0	3.11157	41.8305	ITGAM;CFH;C1S;C1R;ITGB2;CFI;C5AR1;PTAFR;FPR3;ICAM1;C3;FCGR3A;HLA-DMA;FCGR2A;C3AR1;HLA-DPB1;HLA-DRA;HLA-DQA1;HLA-DRB1;HLA-DPA1;HLA-DQB1
Ras signaling pathway	47/232	1.6e-06	1.17e-05	0	0	2.04117	27.2434	CSF1R;RALA;RALB;SHC1;RASGRF2;RASAL2;EFNA5;STK4;ELK1;ETS1;ETS2;CDC42;PAK1;FGF7;TBK1;SYNGAP1;RAP1A;RRAS;GNG5;RASSF5;AKT3;PDGFC;ABL1;PLCG1;RAC1;RALGDS;PAK2;PDGFRB;PDGFRA;BAD;GNG12;RHOA;NFKB1;EFNA1;TIAM1;RASA3;GNB2;GNB1;RASA2;REL;GNB4;GRB2;CALM2;MET;EPHA2;ARF6;BCL2L1
Dilated cardiomyopathy (DCM)	25/91	1.72e-06	1.23e-05	0	0	2.76801	36.7385	ITGB1;ITGB5;ITGB4;ADCY3;CACNA1C;ADCY7;ACTB;ACTG1;SGCD;LMNA;ITGAV;ITGB6;TGFB1;ITGA4;TPM4;ITGA3;TGFB3;TPM2;CACNA2D1;ITGA2;ITGA1;CACNB1;CACNB3;ITGA11;ITGA5
Rheumatoid arthritis	25/91	1.72e-06	1.2e-05	0	0	2.76801	36.7385	CD86;ATP6V1A;ITGB2;CXCL1;ICAM1;HLA-DMA;CTSL;CTSK;ACP5;CTLA4;ATP6V1E1;ATP6V1D;HLA-DQA1;HLA-DPA1;ATP6V0B;TGFB1;IL15;TGFB3;IL18;ATP6V1B2;HLA-DPB1;HLA-DRA;TLR4;HLA-DRB1;HLA-DQB1
Human immunodeficiency virus 1 infection	44/212	1.73e-06	1.19e-05	0	0	2.09116	27.7423	CXCR4;ITPR3;GNAI2;PPP3CA;PAK1;TBK1;CASP8;GNG5;CFL2;AKT3;CFL1;AP1S3;PLCG1;FADD;RAC1;B2M;PAK2;PDIA3;BAD;LIMK1;HLA-B;HLA-C;TRAF2;HLA-A;HLA-F;GNG12;TMEM173;TNFRSF1B;NFKB1;HLA-E;NFATC4;TNFRSF1A;TAPBP;CD4;WEE1;GNB2;GNB1;GNB4;BAX;CALR;CALM2;TLR4;MYD88;BCL2L1
Transcriptional misregulation in cancer	40/186	1.99e-06	1.33e-05	0	0	2.16679	28.441	CD86;CSF1R;DDX5;CDKN1A;CEBPB;SPI1;SLC45A3;ITGAM;BCL2A1;MAX;PLAT;PLAU;CD14;RUNX1T1;ZBTB17;MEF2C;JUP;FUS;IL1R2;TFE3;MITF;ETV1;RUNX2;NFKB1;PML;RUNX1;MAF;ZEB1;SPINT1;BCL6;REL;BMP2K;BAX;PPARG;ERG;TP53;HIST2H3C;MET;BCL2L1;BIRC3
Hippo signaling pathway	36/160	2.11e-06	1.38e-05	0	0	2.267	29.6235	YAP1;GSK3B;BMPR2;YWHAB;SERPINE1;ITGB2;LEF1;ACTB;ACTG1;GLI2;CCND3;PAK1;RASSF2;PPP2R1A;CTNNA1;DVL3;WNT2;TEAD1;YWHAG;YWHAH;FZD1;WWTR1;PRKCI;TGFB1;FZD2;TGFB3;WNT5A;WNT7A;CSNK1E;AXIN2;YWHAZ;TGFBR1;MOB1A;FRMD6;CTNNB1;DCHS1
HIF-1 signaling pathway	26/100	3.33e-06	2.14e-05	0	0	2.61965	33.0407	CDKN1A;PFKFB3;SERPINE1;SLC2A1;ENO1;ENO2;HIF1A;HK2;HK1;HK3;LDHA;AKT3;PGK1;HMOX1;PLCG1;TIMP1;EGLN3;EGLN2;IFNGR1;IFNGR2;CYBB;NFKB1;LTBR;ALDOA;TLR4;GAPDH
Chemokine signaling pathway	40/190	3.48e-06	2.19e-05	0	0	2.12117	26.6597	GSK3B;ROCK1;SHC1;SRC;WAS;ADCY3;CXCR4;CXCL1;ARRB2;CXCL14;ADCY7;CXCL16;GNAI2;CDC42;PREX1;PAK1;RAP1A;GNG5;AKT3;GRK6;RAC1;CCL18;JAK3;LYN;CCR1;BAD;STAT2;GNG12;NFKB1;RHOA;VAV1;TIAM1;HCK;PLCB3;GNB2;GNB1;GNB4;GRB2;DOCK2;BCAR1
Protein digestion and absorption	24/90	4.87e-06	3e-05	0	0	2.68682	32.8653	SLC36A1;COL18A1;COL15A1;MME;COL11A1;COL22A1;COL12A1;SLC3A2;COL1A1;COL3A1;SLC7A7;COL1A2;COL4A2;COL5A1;COL4A1;COL6A2;COL5A3;COL7A1;COL6A1;COL5A2;COL10A1;COL4A5;COL6A3;KCNN4
Hypertrophic cardiomyopathy (HCM)	23/85	5.84e-06	3.53e-05	0	0	2.72633	32.8528	ITGB1;TGFB1;ITGB5;ITGA4;TPM4;ITGB4;ITGA3;TGFB3;TPM2;CACNA2D1;ITGA2;ITGA1;CACNA1C;ACTB;ACTG1;CACNB1;CACNB3;SGCD;LMNA;ITGA11;ITGAV;ITGB6;ITGA5
Phospholipase D signaling pathway	33/148	6.78e-06	4.02e-05	0	0	2.24658	26.7368	RALA;DGKD;RALB;SHC1;DGKA;ADCY3;ADCY7;AGPAT4;CYTH3;GNA13;CYTH4;RRAS;AKT3;PDGFC;GNA12;FYN;PLCG1;RALGDS;CYTH1;PDGFRB;PDGFRA;SPHK1;F2R;RHOA;DNM2;PLCB3;LPAR5;LPAR6;DGKQ;GRB2;PLPP2;DGKH;ARF6
Th1 and Th2 cell differentiation	24/92	7.36e-06	4.28e-05	0	0	2.62841	31.0656	STAT5A;NOTCH3;IL4R;JAG1;MAML2;IFNGR1;IFNGR2;IL2RG;NFKB1;PPP3CA;HLA-DMA;CD4;MAF;LCK;IL2RA;HLA-DPB1;HLA-DRA;STAT6;PLCG1;JAK3;HLA-DQA1;HLA-DRB1;HLA-DPA1;HLA-DQB1
Lysosome	29/123	7.68e-06	4.38e-05	0	0	2.37554	27.978	CTSZ;HEXA;GBA;CLTB;LIPA;GNS;LITAF;CTSS;AP3M2;CTSL;CTSK;PSAP;IDS;ACP5;AP1S3;CTSD;CTSC;CTSB;CTSA;ATP6V0B;SLC11A1;LAPTM5;MCOLN1;GALNS;NPC1;PPT1;TPP1;GLA;LGMN
NOD-like receptor signaling pathway	37/178	1.08e-05	6.04e-05	0	0	2.09436	23.9534	RNASEL;TNFAIP3;ITPR3;CXCL1;NOD1;ANTXR2;ANTXR1;PYCARD;PANX1;TBK1;CASP8;IFI16;NAMPT;NLRP1;FADD;GBP2;CTSB;GBP3;IFNAR2;HSP90AA1;RIPK2;STAT2;TRPV2;IL18;CYBB;CYBA;TRAF2;TMEM173;NFKB1;RHOA;PLCB3;TRAF3;TRIP6;TLR4;MYD88;BCL2L1;BIRC3
MAPK signaling pathway	53/295	1.47e-05	8.09e-05	0	0	1.81019	20.1423	RASGRF2;HSPB1;IL1RAP;ARRB2;ELK1;PPP3CA;FGF7;AKT3;MAP3K8;RAC1;PDGFRB;PDGFRA;MEF2C;DUSP3;IL1R1;CACNA2D1;TRAF2;TGFBR1;EREG;TNFRSF1A;CACNB1;CACNB3;MAPKAPK2;RASA2;TP53;MET;EPHA2;CSF1R;MAX;CACNA1C;EFNA5;STK4;RELB;CDC42;PAK1;RAP1A;RRAS;PDGFC;GNA12;FLNA;FLNB;CD14;PAK2;MAP4K4;TGFB1;TGFB3;GNG12;NFKB1;NFKB2;EFNA1;GRB2;MYD88;MAP3K12
Adherens junction	20/72	1.53e-05	8.25e-05	0	0	2.79877	31.0378	PTPN1;SRC;ACTN1;LEF1;WAS;LMO7;ACTN4;IQGAP1;BAIAP2;ACTB;RHOA;TGFBR1;ACTG1;CDC42;CTNNA1;CTNNB1;FYN;RAC1;MET;VCL
Hepatocellular carcinoma	35/168	1.75e-05	9.31e-05	0	0	2.09908	22.988	GSK3B;SMARCD1;CDKN1A;SHC1;MGST3;GSTP1;LEF1;ELK1;ACTB;ACTG1;AKT3;HMOX1;DVL3;E2F3;PLCG1;WNT2;FZD1;NQO1;SMARCC2;TGFB1;FZD2;TGFB3;GSTO1;BAD;WNT5A;WNT7A;AXIN2;TGFBR1;BAX;CTNNB1;GRB2;TP53;MET;BCL2L1;NFE2L2
Epithelial cell signaling in Helicobacter pylori infection	19/68	2.26e-05	0.000118	0	0	2.81523	30.115	ATP6V1A;LYN;ATP6V0B;SRC;ADAM10;CXCL1;NOD1;NFKB1;CDC42;ADAM17;PAK1;ATP6V1B2;CSK;RAC1;PLCG1;ATP6V1E1;MET;ATP6V1D;JAM3
NF-kappa B signaling pathway	23/95	4.15e-05	0.000213	0	0	2.43935	24.6108	LYN;UBE2I;BCL2A1;IL1R1;TNFAIP3;TRAF2;BCL10;NFKB1;ICAM1;TNFRSF1A;RELB;NFKB2;PLAU;TRAF3;LCK;PLCG1;CD14;LTBR;TLR4;CARD11;MYD88;BIRC3;BCL2L1
Inflammatory bowel disease (IBD)	18/65	4.2e-05	0.000212	0	0	2.79016	28.1158	IL4R;TGFB1;IFNGR1;TGFB3;IFNGR2;IL18;IL2RG;NFKB1;HLA-DMA;MAF;HLA-DPB1;HLA-DRA;STAT6;TLR4;HLA-DQA1;HLA-DRB1;HLA-DPA1;HLA-DQB1
Allograft rejection	13/38	4.36e-05	0.000216	0	0	3.4469	34.6104	CD86;HLA-B;HLA-C;HLA-A;HLA-F;HLA-E;HLA-DMA;HLA-DPB1;HLA-DRA;HLA-DQA1;HLA-DRB1;HLA-DPA1;HLA-DQB1
Malaria	15/49	5.08e-05	0.000248	0	0	3.08436	30.4971	CR1;TGFB1;LRP1;TGFB3;ITGB2;IL18;THBS2;THBS1;ICAM1;COMP;PECAM1;SDC1;TLR4;MET;MYD88
Renal cell carcinoma	18/69	9.89e-05	0.000476	0	0	2.62841	24.2364	CDKN1A;EGLN3;TGFB1;EGLN2;TGFB3;BAD;TFE3;SLC2A1;ETS1;HIF1A;CDC42;PAK1;RAP1A;AKT3;GRB2;RAC1;MET;PAK2
Graft-versus-host disease	13/41	0.000107	0.000506	0	0	3.19469	29.2155	CD86;HLA-B;HLA-C;HLA-A;HLA-F;HLA-E;HLA-DMA;HLA-DPB1;HLA-DRA;HLA-DQA1;HLA-DRB1;HLA-DPA1;HLA-DQB1
Pertussis	19/76	0.000119	0.000556	0	0	2.51889	22.7588	ITGB1;ITGAM;C1S;C1R;ITGB2;NOD1;RHOA;NFKB1;GNAI2;PYCARD;C3;CFL2;CFL1;IRF8;ITGA5;CD14;TLR4;CALM2;MYD88
Influenza A	33/171	0.000145	0.000665	0	0	1.94441	17.192	GSK3B;CIITA;RNASEL;TMPRSS4;ADAR;ACTB;ACTG1;ICAM1;PYCARD;SOCS3;HLA-DMA;TBK1;XPO1;AKT3;HLA-DQA1;HLA-DPA1;IFNAR2;IVNS1ABP;IFNGR1;IFNGR2;STAT2;IL18;TNFRSF10B;TNFRSF10A;NFKB1;PML;TNFRSF1A;HLA-DPB1;HLA-DRA;TLR4;MYD88;HLA-DRB1;HLA-DQB1
Intestinal immune network for IgA production	14/48	0.00016	0.000727	0	0	2.93871	25.6774	CD86;IL15RA;TGFB1;ITGA4;IL15;CXCR4;HLA-DMA;HLA-DPB1;HLA-DRA;LTBR;HLA-DQA1;HLA-DRB1;HLA-DPA1;HLA-DQB1
Apelin signaling pathway	28/137	0.000164	0.000734	0	0	2.05924	17.9421	NOTCH3;SERPINE1;ADCY3;PLAT;ITPR3;ADCY7;MYLK;SLC9A1;GNAI2;GNA13;RRAS;GNG5;AKT3;SPP1;MEF2A;MEF2C;JAG1;SPHK1;GNG12;TGFBR1;ACTA2;PLCB3;GNB2;CAMK4;GNB1;APLNR;GNB4;CALM2
Acute myeloid leukemia	17/66	0.000181	0.000797	0	0	2.59522	22.3621	STAT5A;CSF1R;SPI1;ITGAM;BCL2A1;JUP;BAD;LEF1;PML;NFKB1;RUNX1;AKT3;PIM1;GRB2;CD14;PPARD;RUNX1T1
C-type lectin receptor signaling pathway	23/104	0.000182	0.000791	0	0	2.22825	19.1849	PLK3;SRC;STAT2;CBLB;ITPR3;BCL10;LSP1;NFKB1;RHOA;NFKB2;NFATC4;RELB;PYCARD;PPP3CA;PAK1;CASP8;RRAS;CLEC7A;CD209;AKT3;MAPKAPK2;BCL3;CALM2
Type I diabetes mellitus	13/43	0.000183	0.000785	0	0	3.0461	26.2073	CD86;HLA-B;HLA-C;HLA-A;HLA-F;HLA-E;HLA-DMA;HLA-DPB1;HLA-DRA;HLA-DQA1;HLA-DRB1;HLA-DPA1;HLA-DQB1
Necroptosis	31/162	0.000265	0.00111631	0	0	1.92804	15.882	PYGB;TNFAIP3;PYGL;PYCARD;CASP8;CHMP1B;CAPN2;STAT6;CAPN1;FADD;JAK3;IFNAR2;STAT5A;HSP90AA1;PARP4;H2AFY;H2AFZ;IFNGR1;IFNGR2;STAT2;CYBB;TNFRSF10B;TNFRSF10A;TRAF2;TNFRSF1A;CHMP4B;BAX;SQSTM1;TLR4;FTL;BIRC3
Glycolysis / Gluconeogenesis	17/68	0.000267	0.00111176	0	0	2.51889	20.7251	TPI1;ENO1;BPGM;ENO2;HK2;HK1;HK3;ALDH1A3;LDHA;PKM;ALDH3B1;PGK1;DLAT;ALDOA;GAPDH;PFKM;PFKP
Chronic myeloid leukemia	18/76	0.000367	0.00150805	0	0	2.38632	18.8747	STAT5A;CDKN1A;TGFB1;SHC1;TGFB3;BAD;CBL;TGFBR1;NFKB1;RUNX1;BCR;AKT3;ABL1;BAX;E2F3;GRB2;TP53;BCL2L1
Prostate cancer	21/97	0.000463	0.00187573	0	0	2.18131	16.7484	PDGFRB;PDGFRA;GSK3B;CDKN1A;HSP90AA1;BAD;IL1R2;GSTP1;LEF1;PLAT;NFKB1;ZEB1;SPINT1;PLAU;AKT3;PDGFC;CTNNB1;GRB2;E2F3;ERG;TP53
Autoimmune thyroid disease	14/53	0.000498	0.00199214	0	0	2.66147	20.2401	CD86;HLA-B;HLA-C;HLA-A;HLA-F;HLA-E;HLA-DMA;HLA-DPB1;CTLA4;HLA-DRA;HLA-DQA1;HLA-DRB1;HLA-DPA1;HLA-DQB1
Sphingolipid signaling pathway	24/119	0.000571	0.00225554	0	0	2.03205	15.1748	ABCC1;CERS6;ROCK1;SPHK1;TRAF2;SGMS2;SGPP2;NFKB1;RHOA;TNFRSF1A;GNAI2;GNA13;SGPL1;PLCB3;SPTLC2;PPP2R1A;AKT3;GNA12;BAX;DEGS1;FYN;RAC1;TP53;CTSD
Colorectal cancer	19/86	0.00065	0.00253396	0	0	2.226	16.3358	GSK3B;CDKN1A;RALA;RALB;TGFB1;TGFB3;BAD;LEF1;AXIN2;RHOA;TGFBR1;EREG;AKT3;BAX;CTNNB1;GRB2;RAC1;TP53;RALGDS
T cell receptor signaling pathway	21/101	0.000812	0.00312788	0	0	2.09492	14.9063	GSK3B;CBLB;BCL10;NFKB1;RHOA;VAV1;CDC42;PPP3CA;PAK1;CD4;PTPRC;LCK;AKT3;CTLA4;MAP3K8;GRB2;LCP2;FYN;PLCG1;PAK2;CARD11
Relaxin signaling pathway	25/130	0.000922	0.00350763	0	0	1.93761	13.5409	SHC1;SRC;ADCY3;ARRB2;ADCY7;GNAI2;GNG5;AKT3;TGFB1;MMP2;GNG12;NFKB1;TGFBR1;COL1A1;ACTA2;PLCB3;COL3A1;COL1A2;COL4A2;COL4A1;GNB2;GNB1;GNB4;COL4A5;GRB2
Basal cell carcinoma	15/63	0.00104014	0.00390688	0	0	2.39894	16.4769	FZD1;GSK3B;CDKN1A;FZD2;WNT5A;LEF1;WNT7A;AXIN2;GLI3;GLI2;DVL3;BAX;CTNNB1;TP53;WNT2
JAK-STAT signaling pathway	29/162	0.00124783	0.0046305	0	0	1.80365	12.0598	CDKN1A;CSF2RB;IL2RG;SOCS3;CCND3;AKT3;PIM1;STAT6;JAK3;SOCS4;MCL1;PDGFRB;IFNAR2;STAT5A;PDGFRA;PIAS3;IL15RA;IL4R;IL15;IFNGR1;IFNGR2;IL10RA;STAT2;OSMR;IL2RA;IL3RA;GRB2;IL7R;BCL2L1
Cytokine-cytokine receptor interaction	46/294	0.00127629	0.00467972	0	0	1.57645	10.5051	CSF1R;IL1RN;BMPR2;CXCR4;TNFRSF11B;CSF2RB;CXCL1;IL1RAP;IL2RG;CXCL14;CXCL16;TNFRSF14;CCL18;RELT;ACVR1;CCR1;IFNAR2;IL15RA;IL4R;TGFB1;TNFRSF12A;IL1R1;IL15;IFNGR1;TGFB3;IL1R2;IFNGR2;IL10RA;TNFRSF19;IL18;TNFRSF10B;IL16;TNFRSF10A;INHBA;OSMR;TNFRSF1B;TGFBR1;TNFRSF10D;TNFRSF1A;CD4;TNFSF4;IL2RA;IL3RA;LTBR;IL7R;TNFRSF21
Neurotrophin signaling pathway	23/119	0.00134964	0.00489046	0	0	1.94738	12.8681	GSK3B;IRS1;SHC1;RIPK2;BAD;IRAK3;NFKB1;RHOA;CDC42;RAP1A;IRAK2;ARHGDIA;CAMK4;AKT3;ARHGDIB;MAPKAPK2;ABL1;BAX;GRB2;PLCG1;RAC1;TP53;CALM2
Central carbon metabolism in cancer	15/65	0.00146169	0.0052349	0	0	2.32513	15.1788	PDGFRB;PDGFRA;SLC2A1;HIF1A;HK2;HK1;HK3;LDHA;PKM;AKT3;SLC16A3;TP53;MET;PFKM;PFKP
Sphingolipid metabolism	1947-12-01	0.00169924	0.00601569	0	0	2.57249	16.4062	UGCG;UGT8;SGPL1;CERS6;SPTLC2;SPHK1;GBA;DEGS1;SGMS2;SGPP2;GLA;PLPP2
Glycerolipid metabolism	14/61	0.00219428	0.00767997	0	0	2.31243	14.1564	DGKD;DGAT1;DGKA;MBOAT2;AGPAT4;PLPP4;GPAT4;DGKQ;LIPG;PLPP2;GLA;LPIN2;MGLL;DGKH
Measles	25/138	0.0022037	0.0076263	0	0	1.82528	11.1664	GSK3B;TNFAIP3;CBLB;ADAR;IL2RG;CCND3;TBK1;CASP8;AKT3;FADD;JAK3;IFNAR2;STAT5A;BAD;STAT2;MSN;NFKB1;CD209;TRAF3;IL2RA;BAX;TP53;TLR4;MYD88;BCL2L1
Legionellosis	13/55	0.00235728	0.00806713	0	0	2.3815	14.4087	ITGAM;CR1;ITGB2;IL18;CXCL1;NFKB1;NFKB2;PYCARD;C3;CASP8;CD14;TLR4;MYD88
Pancreatic cancer	16/75	0.00246656	0.00834834	0	0	2.14945	12.9073	CDKN1A;RALA;RALB;TGFB1;TGFB3;BAD;TGFBR1;NFKB1;CDC42;AKT3;BAX;E2F3;RAC1;TP53;RALGDS;BCL2L1
TNF signaling pathway	21/110	0.0024978	0.00836219	0	0	1.92352	11.5264	CEBPB;JAG1;IL15;TNFAIP3;CXCL1;TRAF2;TNFRSF1B;NFKB1;ICAM1;TNFRSF1A;SOCS3;MMP14;CASP8;CASP10;TRAF3;AKT3;BCL3;MAP3K8;FADD;JUNB;BIRC3
Hepatitis C	27/155	0.0026955	0.00892704	0	0	1.7551	10.3835	GSK3B;CDKN1A;RNASEL;YWHAB;SOCS3;TBK1;CASP8;PPP2R1A;AKT3;E2F3;FADD;LDLR;YWHAG;YWHAH;IFNAR2;BAD;STAT2;TRAF2;YWHAZ;NFKB1;TNFRSF1A;TRAF3;CLDN7;BAX;CTNNB1;GRB2;TP53
Hepatitis B	28/163	0.00280207	0.00918124	0	0	1.73077	10.1724	CDKN1A;YWHAB;SRC;ELK1;TBK1;CASP8;CASP10;AKT3;STAT6;E2F3;FADD;JAK3;STAT5A;TGFB1;TGFB3;BAD;STAT2;HSPG2;YWHAZ;NFKB1;TGFBR1;NFATC4;TRAF3;BAX;GRB2;TP53;TLR4;MYD88
Parathyroid hormone synthesis, secretion and action	20/106	0.00359548	0.0116569	0	0	1.90105	10.6993	MEF2A;MEF2C;CDKN1A;VDR;PDE4D;ADCY3;ITPR3;ARRB2;ADCY7;RUNX2;RHOA;GNAI2;GNA13;MMP14;PLCB3;MAFB;MMP16;GNA12;PDE4B;ARHGEF1
Choline metabolism in cancer	19/99	0.00367828	0.0118012	0	0	1.93369	10.839	PDGFRB;PDGFRA;SLC22A3;DGKD;SLC44A4;SLC44A1;SLC44A2;DGKA;WAS;HIF1A;DGKQ;AKT3;PDGFC;GRB2;PLCG1;RAC1;PLPP2;RALGDS;DGKH
Mitophagy	14/65	0.00408476	0.0129702	0	0	2.17012	11.9367	BNIP3L;SRC;ATG9A;TFE3;MITF;AMBRA1;HIF1A;TBK1;RRAS;RAB7B;SQSTM1;TP53;RAB7A;BCL2L1
Insulin signaling pathway	24/137	0.00417508	0.0131217	0	0	1.76506	9.67011	GSK3B;PYGB;SREBF1;PTPN1;PRKCI;IRS1;SHC1;BAD;CBLB;PYGL;CBL;ELK1;HK2;HK1;SOCS3;HK3;GYS1;FASN;AKT3;FLOT1;TRIP10;GRB2;CALM2;SOCS4
Natural killer cell mediated cytotoxicity	23/131	0.0048336	0.0150379	0	0	1.76899	9.43256	IFNAR2;SHC1;IFNGR1;IFNGR2;ITGB2;HLA-B;HLA-C;TNFRSF10B;TNFRSF10A;HLA-A;VAV1;ICAM1;HLA-E;PPP3CA;FCGR3A;PAK1;TYROBP;LCK;GRB2;LCP2;FYN;PLCG1;RAC1
Glycosaminoglycan biosynthesis	1953-12-01	0.00496994	0.0153074	0	0	2.28126	12.1006	B4GALT1;CHPF;CHSY1;CHPF2;DSE;CSGALNACT2;CHST15;XYLT1;CHSY3;ST3GAL1;B4GALT4;ST3GAL2
Gastric cancer	25/149	0.00621761	0.0189606	0	0	1.69053	8.58852	GSK3B;CDKN1A;SHC1;LEF1;FGF7;AKT3;CTNNA1;DVL3;E2F3;WNT2;FZD1;TGFB1;FZD2;JUP;TGFB3;WNT5A;WNT7A;AXIN2;TGFBR1;BAX;CTNNB1;GRB2;TP53;CDH17;MET
TGF-beta signaling pathway	17/90	0.00684935	0.0206823	0	0	1.90316	9.4846	ACVR1;TGIF1;BMPR2;TGFB1;ROCK1;TGFB3;SMURF1;INHBA;THBS1;LTBP1;RHOA;TGFBR1;DCN;PPP2R1A;ID3;FMOD;NBL1
Cellular senescence	26/160	0.00813434	0.0243241	0	0	1.63728	7.87803	CDKN1A;SERPINE1;ITPR3;ETS1;PPP3CA;CCND3;RRAS;RASSF5;AKT3;CAPN2;E2F3;CAPN1;TGFB1;TGFB3;HLA-B;HLA-C;HLA-A;HLA-F;NFKB1;TGFBR1;HLA-E;NFATC4;MAPKAPK2;SQSTM1;TP53;CALM2
Neomycin, kanamycin and gentamicin biosynthesis	2020-05-03	0.00836925	0.0247859	0	0	6.04534	28.916	HK3;HK2;HK1
Oxytocin signaling pathway	25/153	0.00870573	0.0255368	0	0	1.64633	7.80984	CDKN1A;ROCK1;SRC;NPR2;ADCY3;ITPR3;CACNA1C;ELK1;ADCY7;ACTB;ACTG1;MYLK;GNAI2;PPP3CA;MEF2C;CACNA2D1;RHOA;NFATC4;CACNB1;MYL6;CACNB3;PLCB3;CAMK4;MYL9;CALM2
Cholesterol metabolism	1950-11-01	0.0087761	0.0255004	0	0	2.21662	10.4973	ABCA1;NCEH1;NPC1;LRP1;OSBPL5;LIPG;APOC1;TSPO;APOE;LIPA;LDLR
Vibrio cholerae infection	1950-11-01	0.0087761	0.0252621	0	0	2.21662	10.4973	ERO1A;ATP6V1A;SLC12A2;ATP6V0B;ATP6V1B2;ADCY3;PLCG1;ATP6V1E1;ATP6V1D;ACTB;ACTG1
ErbB signaling pathway	16/85	0.00883787	0.0252043	0	0	1.89658	8.96836	STAT5A;GSK3B;CDKN1A;SHC1;SRC;BAD;CBLB;CBL;ELK1;EREG;PAK1;AKT3;ABL1;GRB2;PLCG1;PAK2
p53 signaling pathway	14/72	0.0104094	0.0294138	0	0	1.95914	8.94355	CDKN1A;CD82;SERPINE1;SHISA5;TNFRSF10B;THBS1;CCND3;CASP8;SESN3;PERP;CCNG2;BAX;TP53;BCL2L1
Endometrial cancer	1958-12-01	0.0104702	0.0293165	0	0	2.0846	9.50416	GSK3B;CDKN1A;BAD;AKT3;LEF1;CTNNA1;BAX;CTNNB1;GRB2;AXIN2;ELK1;TP53
Vascular smooth muscle contraction	22/132	0.0106142	0.029452	0	0	1.67926	7.63319	PRKCH;ROCK1;NPR2;ADCY3;ITPR3;CACNA1C;ADCY7;ACTG2;RHOA;MYLK;ACTA2;GNA13;EDNRA;MYL6;PLCB3;CALD1;GNA12;MYH11;MRVI1;ARHGEF1;MYL9;CALM2
Proteasome	1945-10-01	0.0113536	0.0312224	0	0	2.23901	10.0268	PSMA5;PSMA4;PSMC3;PSMD13;POMP;PSME1;PSMD1;PSME2;PSMB10;PSMB8
Chagas disease (American trypanosomiasis)	18/103	0.0123142	0.0335645	0	0	1.76078	7.74214	TGFB1;TGFB3;IFNGR1;IFNGR2;SERPINE1;NFKB1;TGFBR1;TNFRSF1A;GNAI2;C3;PLCB3;CASP8;PPP2R1A;AKT3;FADD;CALR;TLR4;MYD88
Wnt signaling pathway	25/158	0.0129009	0.0348552	0	0	1.59424	6.93565	GSK3B;LEF1;PRICKLE2;PRICKLE1;NKD2;PPP3CA;CCND3;DVL3;RAC1;WNT2;FZD1;FZD2;WNT5A;WNT7A;CSNK1E;AXIN2;RHOA;NFATC4;SFRP4;PLCB3;SFRP2;CTNNB1;ROR2;TP53;PPARD
Fructose and mannose metabolism	1933-08-01	0.0134392	0.0359937	0	0	2.44256	10.5264	HK3;PFKFB3;TPI1;ALDOA;PFKM;HK2;PFKP;HK1
Ferroptosis	1940-09-01	0.0147093	0.0390557	0	0	2.267	9.56511	GPX4;HMOX1;CYBB;ACSL5;SLC3A2;ACSL4;SAT1;TP53;FTL
Other types of O-glycan biosynthesis	2022-06-01	0.0175421	0.0461792	0	0	2.74788	11.1101	ST6GAL1;B4GALT1;ST6GAL2;PLOD3;GXYLT2;COLGALT1
MicroRNAs in cancer	41/299	0.0208991	0.0545502	0	0	1.3816	5.34409	NOTCH3;CDKN1A;SLC45A3;BMPR2;MIR34C;MIR34B;ROCK1;IRS1;SHC1;TNC;THBS1;MIR203A;PLAU;PIM1;ABL1;HMOX1;TIMP3;E2F3;PLCG1;SOX4;MCL1;PDGFRB;PDGFRA;ST14;ABCC1;UBE2I;MIR135B;RHOA;NFKB1;ZEB2;MIR222;ZEB1;MMP16;GRB2;ITGA5;VIM;ZFPM2;EZR;TP53;MET;CD44
B cell receptor signaling pathway	13/71	0.0213876	0.0553563	0	0	1.84482	7.09323	LYN;GSK3B;IFITM1;DAPP1;BCL10;VAV1;NFKB1;PPP3CA;INPP5D;AKT3;GRB2;RAC1;CARD11
Systemic lupus erythematosus	21/133	0.0218019	0.0559583	0	0	1.59088	6.08631	CD86;H2AFY;C1S;H2AFZ;C1R;ACTN1;ACTN4;HIST2H2BE;C3;FCGR3A;HLA-DMA;HIST2H4B;FCGR2A;HLA-DPB1;HLA-DRA;TRIM21;HIST2H3C;HLA-DQA1;HLA-DRB1;HLA-DPA1;HLA-DQB1
cGMP-PKG signaling pathway	25/166	0.022836	0.0581279	0	0	1.5174	5.73491	ROCK1;IRS1;NPR2;ADCY3;ITPR3;CACNA1C;ADCY7;MYLK;GNAI2;GNA13;PPP3CA;EDNRA;AKT3;GNA12;MEF2A;VASP;MEF2C;BAD;ATP2B4;RHOA;NFATC4;PLCB3;MRVI1;MYL9;CALM2
Gap junction	15/88	0.0259266	0.0654539	0	0	1.71743	6.27288	PDGFRB;PDGFRA;SRC;TUBB;ADCY3;ITPR3;ADCY7;TUBA4A;GNAI2;TUBA1C;GJA1;PLCB3;TUBA1A;PDGFC;GRB2
Non-small cell lung cancer	1966-12-01	0.0277612	0.0695158	0	0	1.83192	6.56582	STAT5A;CDKN1A;BAD;RASSF5;AKT3;BAX;E2F3;GRB2;PLCG1;STK4;JAK3;TP53
Glycerophospholipid metabolism	16/97	0.0289995	0.072031	0	0	1.66195	5.88409	DGKD;PCYT2;DGKA;LPCAT1;MBOAT2;TAZ;PLD3;AGPAT4;PLPP4;GPAT4;LPCAT4;DGKQ;PNPLA6;PLPP2;LPIN2;DGKH
Asthma	1931-07-01	0.0293672	0.0723607	0	0	2.27513	8.02637	HLA-DMA;HLA-DPB1;HLA-DRA;HLA-DQA1;HLA-DRB1;HLA-DPA1;HLA-DQB1
Galactose metabolism	1931-07-01	0.0293672	0.0717864	0	0	2.27513	8.02637	HK3;B4GALT1;PFKM;GLA;HK2;PFKP;HK1
Glycosphingolipid biosynthesis	1945-09-01	0.0305079	0.0739877	0	0	2.01511	7.03228	B4GALT1;HEXA;ST3GAL4;B3GNT3;ST3GAL1;GLA;ST3GAL2;B4GALT4;FUT3
Glycosaminoglycan degradation	2019-05-01	0.0341332	0.082133	0	0	2.65146	8.95528	GALNS;HEXA;IDS;HPSE;GNS
Phosphatidylinositol signaling system	16/99	0.0343257	0.0819558	0	0	1.62837	5.49065	MTMR2;DGKD;DGKA;ITPR3;PIK3C2B;ITPKB;INPP4B;PLCB3;DGKQ;INPP5D;PIP4K2A;PLCG1;PLCD3;CALM2;PI4K2A;DGKH
Thyroid hormone signaling pathway	18/116	0.0371785	0.0880846	0	0	1.56345	5.14691	NOTCH3;GSK3B;SRC;BAD;DIO2;SLC2A1;HIF1A;ACTB;ACTG1;SLC9A1;PLCB3;AKT3;CTNNB1;ITGAV;PLCG1;PLCD3;TP53;PFKP
Notch signaling pathway	1948-09-01	0.0442552	0.10405	0	0	1.88917	5.89002	PSENEN;NCOR2;NOTCH3;ADAM17;JAG1;MAML2;DTX3L;DVL3;DTX4
Bladder cancer	1941-08-01	0.0457389	0.106724	0	0	1.96596	6.06462	CDKN1A;SRC;MMP2;DAPK3;E2F3;THBS1;TP53;TYMP
Autophagy	19/128	0.0486759	0.112723	0	0	1.49559	4.52053	UVRAG;IRS1;BAD;ATG9A;DAPK3;AMBRA1;HIF1A;VMP1;RRAS;ATG16L2;CTSL;TP53INP2;AKT3;ATG2A;RAB7B;CTSD;BCL2L1;CTSB;RAB7A
